1 **Activity-dependent endoplasmic reticulum Ca<sup>2+</sup> uptake depends on Kv2.1-mediated**  
2 **endoplasmic reticulum/plasma membrane junctions to promote synaptic transmis-**  
3 **sion.**

4

5 Lauren C. Panzera<sup>1</sup>, Ben Johnson<sup>2,3</sup>, In Ha Cho<sup>1</sup>, Michael M. Tamkun<sup>2</sup>, Michael B. Hoppa<sup>1\*</sup>

6

7 **Affiliations**

8 <sup>1</sup>Department of Biology, Dartmouth College; <sup>2</sup>Department of Biomedical Sciences, Colorado State Univer-  
9 sity; <sup>3</sup>Present address: Department of Neuroscience, Yale University School of Medicine

10 **Contact**

11 \*Corresponding author: michael.b.hoppa@dartmouth.edu

12

13 **Significance**

14 The endoplasmic reticulum (ER) extends throughout the neuron as a continuous organelle, and its dysfunc-  
15 tion is associated with several neurological disorders. During electrical activity, the ER takes up Ca<sup>2+</sup> from  
16 the cytosol which has been shown to support synaptic transmission. This close choreography of ER Ca<sup>2+</sup>  
17 uptake with electrical activity suggests functional coupling of the ER to sources of voltage-gated Ca<sup>2+</sup> entry  
18 through an unknown mechanism. Here we report a non-conducting role for Kv2.1 through its ER binding  
19 domain that is necessary for ER Ca<sup>2+</sup> uptake during neuronal activity. Loss of Kv2.1 profoundly disables  
20 neurotransmitter release without altering presynaptic voltage suggesting that Kv2.1-mediated signaling  
21 hubs play an important neurobiological role in Ca<sup>2+</sup> handling and synaptic transmission independent of ion  
22 conduction.

23

## 24 **Abstract**

25 The endoplasmic reticulum (ER) forms a continuous and dynamic network throughout a neuron, extending  
26 from dendrites to axon terminals, and axonal ER dysfunction is implicated in several neurological disorders.  
27 In addition, tight junctions between the ER and plasma membrane (PM) are formed by several molecules  
28 including Kv2 channels, but the cellular functions of many ER-PM junctions remain unknown. Dynamic  $\text{Ca}^{2+}$   
29 uptake into the ER during electrical activity plays an essential role in synaptic transmission as failure to  
30 allow rapid ER  $\text{Ca}^{2+}$  filling during stimulation activates stromal interaction molecule 1 (STIM1) and de-  
31 creases both presynaptic  $\text{Ca}^{2+}$  influx and synaptic vesicle exocytosis. Our experiments demonstrate that  
32 Kv2.1 channels are necessary for enabling ER  $\text{Ca}^{2+}$  uptake during electrical activity as genetic depletion of  
33 Kv2.1 rendered both the somatic and axonal ER unable to accumulate  $\text{Ca}^{2+}$  during electrical stimulation.  
34 Moreover, our experiments show that the loss of Kv2.1 in the axon impairs synaptic vesicle fusion during  
35 stimulation via a mechanism unrelated to modulation of membrane voltage. Thus, our data demonstrate  
36 that the non-conducting role of Kv2.1 in forming stable junctions between the ER and PM via ER VAMP-  
37 associated protein (VAP) binding couples ER  $\text{Ca}^{2+}$  uptake with electrical activity. Our results further suggest  
38 that Kv2.1 has a critical function in neuronal cell biology for  $\text{Ca}^{2+}$ -handling independent of voltage and  
39 reveals a novel and critical pathway for maintaining ER lumen  $\text{Ca}^{2+}$  levels and efficient neurotransmitter  
40 release. Taken together these findings reveal an essential non-classical role for both Kv2.1 and the ER-PM  
41 junctions in synaptic transmission.

## 42 43 **Introduction**

44 The members of the Kv2 family of voltage-gated  $\text{K}^+$  (Kv) channels, Kv2.1 and Kv2.2 are widely  
45 expressed in neurons within the mammalian brain, with Kv2.1 dominating in hippocampal neurons (1-3).  
46 These channels play an important classical role repolarizing somatic membrane potential during high-fre-  
47 quency stimulation (4). However, Kv2 channels also form micron-sized clusters on the cell membrane,  
48 where they are largely non-conductive (5). When clustered, these non-conductive channels act as molec-  
49 ular hubs directing protein insertion and localization including during the fusion of dense-core vesicles (6-  
50 9), and as sites for the enrichment of voltage-gated  $\text{Ca}^{2+}$  channels (10). The Kv2 clustering mechanism is  
51 due to the formation of stable tethers between the cortical endoplasmic reticulum (ER) and the plasma  
52 membrane (PM) through a non-canonical FFAT motif located on the Kv2 C-terminus, which interacts with  
53 VAMP-associated protein (VAP) embedded in the ER membrane (11). These Kv2.1-mediated junctions  
54 between the ER and PM are in close (~15 nm) proximity (12), forming critical  $\text{Ca}^{2+}$ -signaling domains that  
55 have been conserved from yeast to mammals (12-14) and are necessary to cluster Kv2.1 channels. ER-  
56 PM junctions are formed by many types of proteins, although most are ER proteins that transiently interact  
57 with specific lipids on the PM (reviewed previously (15)). The purpose of the Kv2.1-VAP mediated ER-PM  
58 junctions is not functionally understood in neurons to date.

59  
60 Cytosolic  $\text{Ca}^{2+}$  is essential for initiating multiple cell functions including secretion, muscle contrac-  
61 tion, proliferation, apoptosis, and gene expression (reviewed previously (16)). However,  $\text{Ca}^{2+}$  is also

62 strongly buffered, especially in most neurons, and often requires local  $\text{Ca}^{2+}$  exchange between channels  
63 and pumps localized to organelles and the PM. The ER plays a central role in both  $\text{Ca}^{2+}$  signaling and  
64 storage, and dysfunction of ER morphology and  $\text{Ca}^{2+}$  handling has been linked to several unique neurolog-  
65 ical pathologies including hereditary spastic paraplegia (17), Alzheimer's disease (18), and amyotrophic  
66 lateral sclerosis (19). Currently, the only known cellular mechanism used to replenish ER  $\text{Ca}^{2+}$  stores is  
67 through activation of store-operated  $\text{Ca}^{2+}$  entry (SOCE). Depletion of the ER's luminal  $\text{Ca}^{2+}$  is sensed by  
68 stromal interaction molecule 1 (STIM1), which aggregates and concentrates Orai proteins on the PM to  
69 initiate  $\text{Ca}^{2+}$  influx through  $\text{Ca}^{2+}$  release-activated  $\text{Ca}^{2+}$  (CRAC) channels. Recent studies, however, have  
70 revealed that a second frequently accessed pathway exists in neurons where stimulation-evoked  $\text{Ca}^{2+}$  influx  
71 is rapidly taken up by the ER during neuronal activity, rather than in reaction to severe depletion of ER  
72 lumen  $\text{Ca}^{2+}$ . Failure to quickly increase luminal  $\text{Ca}^{2+}$  during action potential (AP) firing leads to ER  $\text{Ca}^{2+}$   
73 depletion and impaired synaptic vesicle fusion (20). Thus, luminal ER  $\text{Ca}^{2+}$  plays an essential role in main-  
74 taining synaptic transmission in active healthy neurons suggesting that a mechanism other than SOCE  
75 must be important for neuronal communication.

76  
77 Taken together, Kv2.1 clusters have been shown to localize L-type voltage-gated calcium channels  
78 at the PM while also anchoring the ER in close proximity to the PM (10). We hypothesized that these Kv2.1-  
79 mediated ER-PM junctions are uniquely positioned to serve a critical role as dynamic signaling domains for  
80 rapid ER  $\text{Ca}^{2+}$  uptake during electrical activity in neurons. We measured Kv2.1's role in ER  $\text{Ca}^{2+}$ -handling  
81 using ER-GCaMP6-150 and found that AP-evoked  $\text{Ca}^{2+}$  entry into the somatic ER was absent with genetic  
82 depletion of Kv2.1 channels. This non-conducting role of Kv2.1 which enables ER- $\text{Ca}^{2+}$  filling also requires  
83 sarco/endoplasmic reticulum  $\text{Ca}^{2+}$ -ATPase (SERCA) pumps. Moreover, we demonstrate a novel non-con-  
84 ducting role for Kv2.1 in the axon that is essential for enabling ER- $\text{Ca}^{2+}$  uptake during electrical activity. We  
85 go on to show that depletion of Kv2.1 impaired overall synaptic physiology through decreased presynaptic  
86  $\text{Ca}^{2+}$  entry and synaptic vesicle exocytosis. Finally, we demonstrate that this role requires Kv2.1's C-termi-  
87 nal VAP-binding domain to restore synaptic transmission.

88

## 89 **Results**

90 *Kv2.1 channels have both conducting and non-conducting roles in the soma.*

91 Kv2.1 channels are widely expressed in excitatory and inhibitory neurons in both the hippocampus  
92 (21-24) and cortex (24-27), where they have two prominent functions: One, a conducting role repolarizing  
93 somatic membrane potential during AP firing (3, 4); and two, a scaffolding role forming ER-PM junctions  
94 with the ER-resident protein VAP (11). We sought to quantitatively address Kv2.1 function in both roles. To  
95 measure a role in somatic AP repolarization, we first used a combination of shRNA targeting the endoge-  
96 nous Kv2.1 channel and the optical voltage indicator QuasAr (28, 29) in cultured hippocampal neurons.  
97 Genetic knockdown of Kv2.1 by shRNA resulted in a 76% reduction in immunostained Kv2.1 fluorescence  
98 intensity (Fig. S1A and S1B). We also expressed the shRNA using adeno-associated virus (AAV) for high

99 efficiency transduction and found an 80% reduction in Kv2.1 protein expression (Fig. S1C). Consistent with  
100 Kv2.1's role as a delayed rectifying potassium channel we observed no change in the AP amplitude, but an  
101 increase (14.5%) in the full-width at half maximum (FWHM) of APs recorded in the soma of cultured hippo-  
102 campal neurons lacking the Kv2.1 channel (Control neurons,  $2.01 \pm 0.097$  ms; Kv2.1 KD neurons,  $2.30 \pm$   
103  $0.093$  ms;  $p < 0.05$ ) (Fig. 1A-C).

104 While conductive Kv2.1 channels have homogenous membrane expression, endogenous and  
105 transfected Kv2.1 channels also prominently localize in micron-sized clusters within the somatodendritic  
106 compartments and axon initial segment both *in vivo* and *in vitro* (30-32), and have been thought to be  
107 excluded from the distal axon and presynaptic terminals (24). An example is seen in a hippocampal neuron  
108 expressing Kv2.1 tagged with mGreenLantern (33), where clustering is obvious in the soma, proximal den-  
109 drites and axon initial segments of our cultured hippocampal neurons, consistent with previous findings (24,  
110 34, 35) (Fig. 1D). Previously, we and others demonstrated that Kv2.1 localization is necessary and sufficient  
111 to induce ER-PM junctions across cell types, including HEK cells and developing hippocampal neurons (12,  
112 36). Further, TIRF imaging in young cultured hippocampal neurons showed retraction of cortical ER follow-  
113 ing declustering of Kv2.1 channels (12), indicating that both the expression and placement of Kv2.1 within  
114 the membrane is important for junction formation.

115 Given the role for Kv2.1 clusters in both localizing voltage-gated  $\text{Ca}^{2+}$  channels (10) and forming  
116 ER-PM junctions (11) we were curious about the effect of reducing Kv2.1 expression on ER  $\text{Ca}^{2+}$  uptake  
117 during electrical activity. We expressed the low-affinity ER  $\text{Ca}^{2+}$  indicator ER-GCaMP6-150 (ER-GCaMP)  
118 in cultured hippocampal neurons and measured ER  $\text{Ca}^{2+}$  influx in the soma of transfected neurons during  
119 stimulation (Fig. 1E-F). While a train of 50 APs normally causes a robust increase in ER  $\text{Ca}^{2+}$ , this process  
120 was severely impaired (97.64%) by the loss of Kv2.1 (Control neurons,  $41.21 \pm 8.89\%$   $\Delta\text{F}/\text{F}$ ; Kv2.1 KD  
121 neurons,  $0.97 \pm 1.87\%$   $\Delta\text{F}/\text{F}$ ;  $p < 0.001$ ) (Fig. 1G-H). To ensure that this uptake was mediated by SERCA  
122 pumps we applied the SERCA inhibitor cyclopiazonic acid (CPA), which completely blocked ER  $\text{Ca}^{2+}$  filling  
123 (Control neurons,  $40.85 \pm 7.42\%$   $\Delta\text{F}/\text{F}$ ; CPA-treated control neurons,  $-7.74 \pm 0.84\%$   $\Delta\text{F}/\text{F}$ ;  $p < 0.01$ ) (Fig.  
124 S2A, C). Importantly, ER  $\text{Ca}^{2+}$  influx in Kv2.1 knockdown neurons was impaired to the extent that SERCA  
125 inhibition had little effect (Kv2.1 knockdown neurons,  $2.21 \pm 3.51\%$   $\Delta\text{F}/\text{F}$ , CPA-treated knockdown neurons,  
126  $-3.52 \pm 1.34\%$   $\Delta\text{F}/\text{F}$ ) (Fig. S2B-C). We also examined the effect of Kv2.1 on somatic ER  $\text{Ca}^{2+}$  refilling fol-  
127 lowing store depletion with  $\text{Ca}^{2+}$ -free external solutions in developing neurons (8 DIV) before neurons ex-  
128 press significant levels of Kv2.1 channels (30, 37). TIRF imaging was used to optically isolate ER/PM junc-  
129 tions and ER  $\text{Ca}^{2+}$  levels were measured with the ER-targeted fluorescent  $\text{Ca}^{2+}$  indicator CEPIAer (38) with  
130 and without Kv2.1 transfection as illustrated in Fig. S3A. After reintroducing extracellular  $\text{Ca}^{2+}$  the refilling  
131 rate of the cortical ER in Kv2.1-expressing neurons was 5-fold greater than that observed in neurons without  
132 Kv2.1 (Fig. S3B). To test whether ER-PM junction formation through VAP recruitment was sufficient to  
133 increase the rate of ER  $\text{Ca}^{2+}$  refilling, we used a chimeric approach. VAPs are typically diffusely localized  
134 in the ER and expressing the Kv2.1 C-terminal tail including the non-canonical FFAT VAP-binding domain  
135 fused to a single-pass transmembrane glycoprotein (CD4) is sufficient to redistribute VAPs near the plasma

136 membrane of HEK cells and neurons (11). The refilling rate at ER/PM contact sites formed by the CD4-  
137 Kv2.1FFAT motif chimera was half that of Kv2.1-induced ER/PM junctions (Fig. S3B). This intermediate  
138 value suggests that simply forming ER-PM junctions does not confer efficient ER-Ca<sup>2+</sup> uptake, and Kv2.1  
139 functionalizes the ER-PM junction with regards to Ca<sup>2+</sup> handling.

140 Taken together, our results confirm the canonical ionotropic role of Kv2.1 channels at the soma for  
141 regulating membrane voltage, while also revealing a novel non-conducting role for Kv2.1 in regulating ER  
142 Ca<sup>2+</sup> filling during electrical activity or following ER store depletion.

143

144 *Endogenous and transfected Kv2.1 localize beyond the somatodendritic compartment into axons and pre-*  
145 *synaptic compartments.*

146 Somatic Kv2.1 clearly regulates ER Ca<sup>2+</sup> stores as illustrated in Figs. 1, S2 and S3. Since ER Ca<sup>2+</sup>  
147 regulates axonal glutamate release we wondered whether Kv2 channels could influence Ca<sup>2+</sup> homeostasis,  
148 and thus glutamate release, in this neuronal compartment. However, the Kv2 channel dogma states that  
149 these channels are only found on the neuronal soma, axon initial segment, and within proximal dendrites  
150 (30, 31, 39). Therefore, we first sought to determine whether Kv2.1 channels could be found localized over  
151 the ER at presynaptic sites.

152 The first set of experiments sought to immunolocalize endogenous Kv2.1 and its similar family  
153 member, Kv2.2, within axons of our neuronal cultures. As illustrated in Fig. 2A, Kv2.1 can be detected in  
154 synapsin-positive presynaptic compartments in DIV 16 hippocampal cultures (see white arrows in Fig. 2A  
155 inset). The level of expression is much lower than that observed on the soma and, if detected by investiga-  
156 tors previously, was probably viewed as non-specific antibody staining. As demonstrated in Fig. S4A and  
157 B, use of a dominant-negative construct which blocks Kv2.1 trafficking to the neuronal surface prevented  
158 detection of Kv2.1 on both the somatic surface and in axonal compartments, validating the axonal immu-  
159 nolabeling. Kv2.2 immunostaining was also detected weakly in both somatic and axonal compartments  
160 (Fig. S5A-B) and this was also blocked following expression of the dominant-negative construct (see Fig.  
161 S5C and D). Note that while some Kv2.2 immunostaining was present in presynaptic compartments (see  
162 white arrows in Fig. S5A inset) it often appeared at a much lower level compared to Kv2.1, and Kv2.2 was  
163 at times not detected. In addition, Kv2.2 immunolabeling was often found adjacent to the synapsin puncta  
164 as opposed to fully co-localizing (see yellow arrowheads in Fig. S5A inset). Perhaps Kv2.2 predominates  
165 in postsynaptic (dendritic) compartments while present at a much lower level relative to Kv2.1 on the pre-  
166 synaptic side. However, given that the anti-Kv2.2 antibody is likely less efficient than its Kv2.1 counterpart,  
167 this issue remains an open question at this time. Still, these immunolabeling data indicate both Kv2.1 and  
168 2.2 are expressed in both somatic and presynaptic compartments in our neuronal cultures and surface  
169 trafficking of both variants is impaired by expression of the DN form of Kv2.1.

170 We next transfected neurons with GFP-Kv2.1 and dsRedER followed by fixation and immunolabel-  
171 ing for synapsin. As shown in Fig. 2B, the transfected Kv2.1 localized to presynaptic compartments that  
172 were enriched in the ER luminal marker dsRedER. In summary, we were surprised to discover a population

173 of Kv2 channels that existed beyond the somatodendritic and axon initial segment compartments, with both  
174 the endogenous Kv2 channels and the transfected Kv2.1 clearly present in presynaptic compartments. This  
175 localization is not fully unexpected, however, given that ER/PM junctions have been reported in axon ter-  
176 minals (40) and the only known localization mechanism for Kv2 channels involves tethering to ER VAPs.

177

178 *Loss of Kv2.1 impairs axonal ER Ca<sup>2+</sup> influx during stimulation independent of ion conduction.*

179 We next investigated the functional role of axonal Kv2.1 channels. During our previous efforts to  
180 understand modulation of the AP waveform in cultured hippocampal neurons, we found that presynaptic  
181 terminals primarily rely on Kv1 and Kv3 channels to repolarize the AP (41). Consistent with this finding,  
182 optical recordings of axonal AP waveforms uncovered no difference in the amplitude or FWHM between  
183 control and Kv2.1 KD neurons (Fig. 3A-C). Next, we confirmed previous findings that the axonal ER takes  
184 up Ca<sup>2+</sup> during AP stimulation and again observed a robust increase in luminal Ca<sup>2+</sup> from SERCA pump  
185 activation during trains of stimulation (Fig. 3D-G). This process of axonal ER Ca<sup>2+</sup> filling during neuronal  
186 activity also appeared to rely on Kv2.1 channels as neurons transfected with Kv2.1 shRNA were severely  
187 impaired in ER Ca<sup>2+</sup> uptake during trains of stimulation identical to the soma (Control neurons, 33.04 ±  
188 7.63% ΔF/F; Kv2.1 KD neurons, 5.26 ± 2.97% ΔF/F;  $p < 0.01$ ) (Fig. 3F-G).

189 Since both Kv2.1 and Kv2.2 localized to presynaptic compartments where they form ER-PM junc-  
190 tions, we wanted to determine the level of contribution from total Kv2 channels to regulate axonal ER Ca<sup>2+</sup>.  
191 We used the dominant-negative construct (Kv2.1 DN) illustrated in Fig. S4 that prevents both Kv2.1 and  
192 Kv2.2 from being expressed at the PM (42). We found that depletion of surface Kv2.1 and Kv2.2 channels  
193 dramatically decreased axonal AP-evoked ER Ca<sup>2+</sup> influx (Control neurons, 18.17 ± 4.99% ΔF/F; Kv2.1 DN  
194 neurons, 3.18 ± 2.17% ΔF/F;  $p < 0.05$ ) (Fig. S6A-B). Importantly, the additional loss of Kv2.2 did not sub-  
195 stantially change the percent decrease in ER-GCaMP responses (Kv2.1 shRNA KD neurons 84.08% de-  
196 crease; Kv2.1 DN neurons, 82.50% decrease), indicating Kv2.1 plays the dominant role in axonal ER Ca<sup>2+</sup>  
197 influx in our preparation as implied by the weak presynaptic immunolabeling of Kv2.2 relative to that ob-  
198 served with Kv2.1. Together, these results suggest that while Kv2.1 does not play an ionotropic role in the  
199 axon, it does play a novel and critical role with regards to ER-Ca<sup>2+</sup> handling.

200

201 *Presynaptic Kv2.1 modulates neurotransmission independently of conduction.*

202 This striking non-ionotropic role for axonal Kv2.1 channels in regulating ER Ca<sup>2+</sup> stores was espe-  
203 cially intriguing in light of recent work demonstrating that blocking SERCA pumps or decreasing ER Ca<sup>2+</sup>  
204 stores impairs neurotransmission (20). To explore a non-conducting role for Kv2.1 in modulating vesicle  
205 fusion, we used the pH-sensitive reporter of synaptic vesicle exocytosis (pHluorin) fused to the vesicular  
206 glutamate transporter (vGlut-pHluorin). vGlut-pHluorin signals are reported as a percentage of the total  
207 vesicle pool (% exocytosis), whose fluorescence is obtained by perfusion of a Tyrode's solution containing  
208 50mM NH<sub>4</sub>Cl buffered at pH 7.4 using 25mM HEPES (Fig. 4A-B) (43-46). Neurons transfected with Kv2.1  
209 shRNA had a large (43.6%,  $p < 0.0001$ ) reduction in exocytosis (Fig. 4C-D), consistent with impaired Ca<sup>2+</sup>

210 uptake into the ER. These results suggest that Kv2.1 plays a significant non-conducting role in neurotrans-  
211 mission.

212 To confirm that this result was due to the loss of Kv2.1 protein rather than loss of a conducting,  
213 ionotropic or voltage-sensing role, we turned to pharmacology. Kv2 channels detect membrane potential  
214 changes through a group of positive charges located in the S4 domain of the channel  $\alpha$  subunit. We used  
215 the gating modifier Guanytosin-1E (GxTx) to block Kv2.1 voltage-sensing and conduction. GxTx induces  
216 a depolarizing shift in the voltage-dependent activation of Kv2.1 with high potency and selectivity [ $IC_{50}$ : 0.71  
217 nM, (47)]. Perfusion of 100nM GxTx to prevent potassium conduction through Kv2.1 did not affect vGlut-  
218 pHluorin responses (Fig. 4E-F). Together with the finding that loss of Kv2.1 had no effect on axonal mem-  
219 brane voltage during an AP, these results further demonstrate that axonal Kv2.1 modulates neurotransmis-  
220 sion independently of potassium conduction.

221

222 *Reducing Kv2.1 expression impairs presynaptic  $Ca^{2+}$  influx.*

223 It was previously shown that chronically blocking SERCA pumps and ER  $Ca^{2+}$  uptake drives a  
224 STIM1-based feedback loop that inhibits  $Ca^{2+}$  influx from voltage-gated  $Ca^{2+}$  channels and vesicle fusion  
225 (20). We sought to determine if a similar pathway was engaged with the loss of Kv2.1-based ER  $Ca^{2+}$   
226 refilling during electrical activity as a measure of potential ER distress from the loss of Kv2.1. We measured  
227 how depletion of Kv2.1 altered presynaptic  $Ca^{2+}$  influx during trains of stimulation using the fluorescent  $Ca^{2+}$   
228 indicator GCaMP6f fused to synaptophysin (48, 49) (SypGCaMP6f) (Fig. 5A-B). Not surprisingly, compared  
229 to controls, neurons co-transfected with SypGCaMP6f and Kv2.1 shRNA had reduced presynaptic  $Ca^{2+}$   
230 influx when stimulated with 50 APs delivered at 25 Hz (Control neurons,  $288.60 \pm 36.06\%$   $\Delta F/F$ ; Kv2.1 KD  
231 neurons  $186.84 \pm 18.99\%$   $\Delta F/F$ ;  $p < 0.05$ ) (Fig. 5C-D). Thus, the loss of Kv2.1 phenocopies the effects of  
232 blocking SERCA pumps with CPA. These results suggest that disabling ER  $Ca^{2+}$  uptake by the loss of Kv2.1  
233 during electrical activity feeds back into general  $Ca^{2+}$  homeostasis and synaptic transmission.

234

235 *The Kv2.1 channel C-terminus is necessary for maintaining synaptic transmission.*

236 We next addressed the mechanism underlying Kv2.1's role in ER  $Ca^{2+}$  handling and neurotrans-  
237 mission by conducting rescue experiments. To validate our rescue approach, we introduced three silent  
238 point mutations into the coding sequence of Kv2.1 at the shRNA target site. Expression of this "wobbled"  
239 Kv2.1 (wKv2.1) in the Kv2.1 KD background was sufficient to fully rescue the synaptic vesicle exocytosis  
240 defect, confirming the specificity of our shRNA (Kv2.1 KD neurons,  $6.29 \pm 0.89\%$ ; wKv2.1 rescue neurons,  
241  $12.22 \pm 2.40\%$  exocytosis;  $p < 0.05$ ) (Fig. 6A-C).

242 The formation of ER-PM junctions by Kv2.1 channels in the PM occurs via a noncanonical VAP-  
243 binding motif within the C-terminal tail of Kv2.1 (11, 36); deletion or mutation of this motif abolishes both  
244 Kv2.1 clusters and ER-PM junctions (34, 39). However, despite a lack of clustering, the loss of the C-  
245 terminal tail does not alter Kv2.1's electrical function (6, 50). Not surprisingly, without the C-terminal tail

246 that enables VAP binding and Kv2.1 channel clustering, we could no longer visualize punctate Kv2.1 struc-  
247 tures in the soma or axon. Moreover, expressing Kv2.1 with a truncated C-terminus (Kv2 $\Delta$ C318) in the  
248 Kv2.1 KD background was also unable to restore synaptic transmission (Kv2.1 KD neurons,  $7.49 \pm 0.72\%$ ;  
249 Kv2 $\Delta$ C318 neurons,  $9.28 \pm 1.21\%$  exocytosis) (Fig. 6D-F). Next, we were curious if the C-terminus alone  
250 is sufficient to restore synaptic function. To distinguish between the specialized Kv2.1 ER-PM junctions and  
251 simply bringing ER and PM membranes together through the VAP binding domain, we returned to the CD4-  
252 Kv2.1FFAT chimera used in Fig. S3. We transfected this fusion protein consisting of the C-terminus of  
253 Kv2.1 including the VAP-binding domain appended to the transmembrane protein CD4 and tested whether  
254 the Kv2.1 VAP-binding domain alone was sufficient to rescue the synaptic vesicle phenotype (Fig. 6G).  
255 Expression of the CD4-Kv2.1FFAT was localized to the presynaptic terminals (Fig. S7), however it was not  
256 sufficient to restore exocytosis to control levels in Kv2.1 knockdown neurons (Kv2.1 KD neurons,  $6.41 \pm$   
257  $1.35\%$ ; CD4-Kv2.1FFAT neurons,  $7.45 \pm 1.98\%$  exocytosis) (Fig. 6H-I). This result indicates that other  
258 sequences within Kv2.1 are required to enable efficient ER Ca<sup>2+</sup> uptake that can support synaptic transmis-  
259 sion, rather than acting simply to recruit VAP. Further, this observation is in agreement with our finding that  
260 ER Ca<sup>2+</sup> uptake after store depletion is much less efficient when expressing CD4-Kv2.1FFAT instead of full  
261 length Kv2.1 (Fig. S3). At the same time, Kv2.1 clustering and inclusion of the VAP-binding motif is essen-  
262 tial, as expressing Kv2.1 with a truncated C-terminus (Kv2 $\Delta$ C318) was also unable to restore synaptic  
263 transmission. Taken together, these results support the role of Kv2.1 as an essential hub protein that pro-  
264 vides a novel mechanism to enable efficient ER Ca<sup>2+</sup> uptake during electrical stimulation and has an im-  
265 portant function in maintaining neurotransmitter release.

266

## 267 Discussion

268 In most cells, the ER acts mainly as a Ca<sup>2+</sup> source when different pathways activate ryanodine  
269 receptors or inositol 1,4,5-trisphosphate (IP3) receptors. Intriguingly, the neuronal ER acts as a net Ca<sup>2+</sup>  
270 sink in both the soma and axon of neurons, using SERCA pumps to extract Ca<sup>2+</sup> from small microdomains  
271 in the cytosol formed by the opening of voltage-gated Ca<sup>2+</sup> channels. Inhibiting the activity of SERCA during  
272 electrical activity has previously been demonstrated to dramatically impair synaptic function (51, 52) due to  
273 what was recently identified as the perturbation of STIM1 proteins (20). To date, a mechanism that enables  
274 efficient access by SERCA to sources of PM voltage-gated Ca<sup>2+</sup> influx has not been identified. Here, we  
275 provide evidence that the non-conducting signaling hubs of Kv2.1 channels enable this elegant coupling of  
276 Ca<sup>2+</sup> uptake into the ER during electrical activity in both the soma and synaptic terminals (Figs. 1 and 3).  
277 Loss of Kv2.1 renders the ER unable to extract Ca<sup>2+</sup> from the cytosol during electrical activity and makes  
278 the neuron behave as if the SERCA pumps are not functional during stimulation. Interestingly, the loss of  
279 Kv2.1 channels matches the phenotypes of the SERCA block with respect to impaired cytosolic Ca<sup>2+</sup> influx  
280 and vesicle fusion during electrical stimulation (Figs. 4 and 5). Interestingly, impaired AP-evoked calcium  
281 influx was also reported by another group when they knocked down VAP protein using shRNA (53). Our  
282 results demonstrate the importance of regulating internal Ca<sup>2+</sup> stores for maintaining neurotransmission and



283 support the necessity of Kv2.1-VAP ER-PM junctions, as the loss of the C-terminal VAP binding domain  
284 was unable to restore synaptic transmission (Fig. 6). Although the C-terminus alone was shown to recruit  
285 VAP and form ER-PM junctions in neurons and heterologous cells, our CD4-Kv2.1FFAT construct contain-  
286 ing the VAP-binding domain also could not restore synaptic transmission and poorly supported somatic ER  
287  $\text{Ca}^{2+}$  refilling (Figs. 6 and S3). While resolution limitation in fluorescent microscopy precludes us from mak-  
288 ing precise measurements of subsynaptic localization differences between Kv2.1 and CD4-Kv2.1FFAT, our  
289 results suggest that Kv2.1 truly acts a hub either by localizing sites of  $\text{Ca}^{2+}$  entry or through other interac-  
290 tions to position ER-PM junctions specifically proximal to  $\text{Ca}^{2+}$  entry to promote synaptic transmission (Fig.  
291 6). Taken together, these results support a non-conducting role for the Kv2.1 channel as a hub-protein to  
292 couple ER  $\text{Ca}^{2+}$  handling with electrical activity essential for neuronal function. Kv2.1 has also been identi-  
293 fied to play a non-conducting role in exocytosis/secretion in other cells, especially those that are electrically  
294 active, e.g. insulin release in pancreatic beta cells (6) although a role for modulating the ER's  $\text{Ca}^{2+}$  handling  
295 was not explored in those studies.

296  
297 To date, the most well-known ER-PM junction with respect to  $\text{Ca}^{2+}$  handling is formed between the  
298 ER-lumen  $\text{Ca}^{2+}$  sensor STIM1 and the  $\text{Ca}^{2+}$  channel Orai, which are the fundamental working machinery of  
299 the CRAC channel. In the classical pathway for store-operated calcium entry (SOCE), the CRAC channel  
300 is formed only when the ER lumen  $\text{Ca}^{2+}$  concentration is dramatically depleted and transiently exists until  
301 the ER lumen is filled. Kv2.1 could also enhance this process as suggested by the somatic ER refilling data  
302 of Fig. S3. However, in the context of neuronal signaling, the process of activating a CRAC channel is rather  
303 slow and can cause  $\text{Ca}^{2+}$  spillover into the cytosol when activated; it is difficult to imagine neurons relying  
304 on this mechanism alone to maintain ER  $\text{Ca}^{2+}$ . Indeed, chronic activation of CRAC channels was found to  
305 upregulate spontaneous vesicle fusion (54). Additionally, activation of STIM appears to inhibit or activate a  
306 number of PM proteins (55). Thus, although STIM1 and Orai can replenish ER stores when the ER lumen  
307 is severely depleted of  $\text{Ca}^{2+}$ , an “on-demand” mechanism to efficiently keep the ER filled and coupled to  
308 electrical activity solves several problems without perturbing additional novel sources of  $\text{Ca}^{2+}$  entry and  
309 spillover. In this way, the Kv2.1-VAP ER-PM junctions are different than CRAC channels in that they are  
310 engaged independent of ER-lumen  $\text{Ca}^{2+}$  levels. Interestingly, Kv2.1 clusters are dynamic in some situations  
311 and can be dispersed in hypoxic conditions such as a stroke (56, 57) or when exposed to high levels of  
312 extracellular glutamate (12, 56, 58). This may be quite useful for limiting neurotransmitter release under  
313 certain pathological conditions that will require additional experiments.

314  
315 Why form ER-PM junctions with a voltage-sensitive protein? The movement of the positive charges  
316 within the voltage sensor during membrane depolarization produces a gating current that precedes and is  
317 independent of ion conduction during channel opening. It is possible that electrically excitable cells could  
318 be using Kv2.1 as a voltage sensor to communicate changes in membrane potential across the ER-PM  
319 junction just as the charge movement of the voltage sensor in L-type  $\text{Ca}^{2+}$  channels communicates to

320 ryanodine receptors in mammalian skeletal muscle during excitation-contraction coupling (59, 60). Although  
321 we cannot fully rule out communication of charge movement from Kv2.1 to the ER initiating  $\text{Ca}^{2+}$  uptake, it  
322 seems unlikely as our use of the gating modifier GxTx, which should block both voltage-sensing and con-  
323 duction, did not impair neurotransmission. It has also been shown that ion channels have preferred lipid  
324 environments, so the localization of ER-PM junctions by an ion channel could also help direct the junctions  
325 to favorable areas within the heterogeneous lipid environment of the PM.

326  
327 As the Kv2.1-VAP mediated ER-PM junction allows the ER to quickly access  $\text{Ca}^{2+}$  during electrical  
328 activity, a key question remains as to what the ER is doing with the additional  $\text{Ca}^{2+}$ . It has been proposed  
329 that an essential role of the ER is to shuttle  $\text{Ca}^{2+}$  to other organelles, including the mitochondria  $\text{Ca}^{2+}$  uni-  
330 porter (MCU), which has different affinities for  $\text{Ca}^{2+}$  depending on subunit expression. A recently identified  
331 MICU3 subunit is required for neuronal mitochondria to receive  $\text{Ca}^{2+}$  from the cytosol (61), but it remains  
332 unclear if they also receive  $\text{Ca}^{2+}$  from the ER to couple electrical activity to ATP production. A second  
333 possibility is that the ER may be shuttling  $\text{Ca}^{2+}$  to other organelles, or  $\text{Ca}^{2+}$ -sensitive proteins. Indeed, the  
334 cytosol of the neuron is one of the most highly buffered  $\text{Ca}^{2+}$  environments identified between cells; thus, a  
335 mechanism to coordinate delivery to microdomains of  $\text{Ca}^{2+}$  within the cytoplasm may be very useful for  
336 coupling  $\text{Ca}^{2+}$  signaling to protein activation in distal processes of neurons like the axon. One example is  
337 seen in *Drosophila*, where ER  $\text{Ca}^{2+}$  is used to activate calcineurin, a  $\text{Ca}^{2+}$ -dependent phosphatase, in an  
338 essential role for synapse development (62). Alternatively, rather than acting to move  $\text{Ca}^{2+}$  between orga-  
339 nelles, the ER may be polarized within the neuron taking in  $\text{Ca}^{2+}$  during electrical stimulation, which may  
340 then be released at other subcellular locations within the soma or axon. As the dynamics of ER  $\text{Ca}^{2+}$  are  
341 not static, our identification of a novel, on demand mechanism for ER  $\text{Ca}^{2+}$  filling during electrical stimulation  
342 opens new avenues of research to understand ER signaling in neurons.

#### 343 344 **Acknowledgements**

345 We thank Samuel Bergerson, Michelle Gleason, and Amelia Ralowicz for critical reading of the manu-  
346 script. This work was supported by the Esther A. and Joseph Klingenstein Fund (M.B.H.), NIH NINDS  
347 grant F31NS110192 (L.C.P.), NIH NINDS grant 1R01NS112365 (M.M.T. and M.B.H.), and P20 NIGMS  
348 grant GM113132 (M.B.H.).

349  
350  
351  
352  
353

## 354 **Materials and Methods**

### 355 **Cell Culture and Transfection**

356 Primary neurons from postnatal day 0-1 Sprague Dawley rats of either sex were cultured for all experiments.  
357 Briefly, hippocampal CA1-CA3 regions with the dentate gyri removed were harvested, tissue was dissoci-  
358 ated into single cells with bovine pancreas trypsin and cells were plated onto poly-L-ornithine-coated glass  
359 coverslips inside a 6mm cloning cylinder.  $Ca^{2+}$  phosphate-mediated DNA transfection was performed on  
360 cultures at 5-6 days *in vitro* (DIV). In some cases, GFP-Kv2.1 and dsRedER were transfected using Lipofec-  
361 tamine 2000 (Life Technologies) as previously described (12). All experiments were performed on mature  
362 neurons between 14-24 days *in vitro* unless noted otherwise. To ensure reproducibility, experiments were  
363 performed on neurons from a minimum of three separate cultures. All protocols used were approved by the  
364 Institutional Animal Care and Use Committee at Dartmouth College and conform to the NIH Guidelines for  
365 the Care and Use of Animals.

366

### 367 **Genetic Tools**

368 The following constructs were used: QuasAr2 (variant DRH334, hSyn promoter) (28), vGlut-pHluorin (43),  
369 SypGCaMP6f (48, 49), ER-GCaMP6-150 (Addgene #86918) (20), CD4-Kv2.1FFAT (11), mGreenLantern  
370 (Addgene #161912) (33), and R-CEPIA1er (Addgene #58216) (38). To reduce endogenous Kv2.1 expres-  
371 sion for live cell imaging, an shRNA plasmid was obtained from OriGene against the following mRNA target  
372 sequence: CAGAGTCCTCCATCTACACCACAGCAAGT. For rescue experiments in Kv2.1 knockdown  
373 neurons, three silent mutations were introduced into the rat Kv2.1 sequence to generate the “wobbled”  
374 Kv2.1 (wKv2.1) construct: C2154T, C2157A, C2160T.

375

### 376 **Live Cell Imaging**

377 All experiments were performed at 34°C using a custom-built objective heater. Cultured cells were mounted  
378 in a rapid-switching laminar flow perfusion and stimulation chamber on the stage of a custom-built epifluo-  
379 rescence microscope. Neurons were continuously perfused at a rate of 400 $\mu$ l/min in a modified Tyrode’s  
380 solution containing the following (in mM): 119 NaCl, 2.5 KCl, 2 CaCl<sub>2</sub>, 2 MgCl<sub>2</sub>, 25 HEPES, and 30 glucose  
381 with 10  $\mu$ M CNQX (Sigma-Aldrich) and 50  $\mu$ M AP5 (Sigma-Aldrich). Images were obtained using either a  
382 Zeiss Observer Z1 equipped with an EC Plan-Neofluar 40x 1.3 NA oil immersion objective, or an Olympus  
383 IX-83 microscope equipped with a 40x 1.35 NA oil immersion objective (UApoN40XO340-2). All images  
384 were captured with an IXON Ultra 897 EMCCD (Andor) that was cooled to -80°C by an external liquid  
385 cooling system (EXOS). All excitation light occurred via OBIS lasers (Coherent). APs were evoked by pass-  
386 ing 1 ms current pulses yielding fields of  $\sim$ 12 V/cm<sup>2</sup> via platinum/iridium electrodes. Timing of stimulation  
387 was delivered by counting frame numbers from a direct readout of the EMCCD rather than time itself for  
388 more exact synchronization using a custom-built board powered by an Arduino Duo chip manufactured by  
389 an engineering firm (Sensorstar).

390

391 *Voltage Measurements:* QuasAr fluorescence was recorded with a 980  $\mu$ s exposure time; images were  
392 acquired at 1 kHz using an OptoMask (Cairn Research) to prevent light exposure of non-relevant pixels.  
393 Cells were illuminated with 70 – 120 mW by an OBIS 637 nm laser (Coherent) with ZET635/20 $\times$ , ET655lpm,  
394 and ZT640rdc filters (Chroma). For somatic recordings, 25 AP stimulations delivered a 4 Hz were trial  
395 averaged, and for axonal recordings 100 AP stimulations delivered at 4 Hz were trial averaged.

396  
397 *Cytosolic Calcium Measurements:* GCaMP6f fluorescence was recorded with a 29.5 ms exposure time and  
398 images were acquired at 30 Hz. Cells were illuminated by an OBIS 488 nm laser at 7-9 mW (Coherent)  
399 with ET470/40x, ET525/50 m, and T495lpxr filters (Chroma). We repeated and averaged 3-4 trials to meas-  
400 ure AP train stimulation-induced responses.

401  
402 *ER Calcium Measurements:* ER-GCaMP6-150 fluorescence was recorded with a 19.8 ms exposure time  
403 and images were acquired at 50 Hz. Cells were illuminated by an OBIS 488 nm laser at 7-9 mW for axonal  
404 recordings, 1-2 mW for somatic recordings (Coherent) with ET470/40x, ET525/50 m, and T495lpxr filters  
405 (Chroma). We repeated and averaged 3-4 trials measure AP train stimulation-induced responses.

406  
407 *Vesicle Fusion Measurements:* vGlut-pHluorin fluorescence was captured with an exposure time of 9.8 ms  
408 and images were acquired at 100 Hz. Cells were illuminated by an OBIS 488 nm laser at 7-9 mW (Coherent)  
409 with ET470/40x, ET525/50 m, and T495lpxr filters (Chroma). For Guangxitoxin experiments, GxTx was  
410 continuously perfused at 100 nM (Alomone Labs). Cells were bathed in 50 mM NH<sub>4</sub>Cl to neutralize vesicle  
411 pH at the end of each experiment to quantify vesicle pool size.

### 412 413 ***Immunocytochemistry***

414 *To validate the effectiveness of our knockdown strategy:* Neurons were fixed with 4% paraformaldehyde  
415 and 4% sucrose in phosphate-buffered saline (PBS) for 10 minutes, permeabilized with 0.2% Triton X-100  
416 for 10 minutes and blocked with 5% goat serum/5% bovine serum albumin in PBS for 30 minutes at room  
417 temperature. Neurons were then incubated with the Kv2.1 primary antibody K89/34 (1:500, NeuroMab) and  
418 the GFP primary antibody A10262 (1:1000, Invitrogen) overnight at 4°C. Cells were washed three times  
419 with PBS and incubated 1 hour at room temperature with Alexa Fluor-conjugated secondary antibodies  
420 (1:1000, Invitrogen). All antibodies were diluted in 5% goat serum for incubation.

421  
422 *To detect the localization of endogenous Kv2 channels:* Hippocampal cultures of neurons were isolated  
423 from E18 Sprague Dawley rat brains of both sexes. Pregnant rats were deeply anaesthetized with isoflu-  
424 rane, as outlined in a protocol approved by the Institutional Animal Care and Use Committee of Colorado  
425 State University (protocol ID: 15-6130A). Hippocampi were dissociated and cultured as previously de-  
426 scribed for neurons (63, 64). Cultures were seeded on glass-bottom 35mm dishes with No. 1.5 coverslips  
427 (MatTek, Ashland, MA) coated with poly-L lysine (Sigma-Aldrich, St. Louis, MO) in borate buffer, and in a

428 medium composed of Neurobasal (Gibco/Thermo Fisher Scientific, Waltham, MA), B27 Plus Supplement  
429 (Gibco/Thermo Fisher Scientific, Waltham, MA), Penicillin/Streptomycin (Cellgro/Mediatech, Manassas,  
430 VA), and GlutaMAX (Gibco/Thermo Fisher Scientific).

431 Cultures of the indicated day *in vitro* (DIV) were fixed with 4% formaldehyde for 15 min at room  
432 temperature in neuronal imaging saline (NIS) composed of 126 mM NaCl, 4.7 mM KCl, 2.5 mM CaCl<sub>2</sub>, 0.6  
433 mM MgSO<sub>4</sub>, 0.15 mM NaH<sub>2</sub>PO<sub>4</sub>, 0.1 mM ascorbic acid, 8 mM glucose, and 20 mM HEPES, pH 7.4, 300  
434 mOsm. Following six washes with NIS the fixed cells were blocked in NIS with 10% goat serum and 0.1%  
435 Triton X-100 for 4-10 hrs at room temperature. Purified Kv2 mouse monoclonal antibodies, knockout veri-  
436 fied, were from NeuroMab (Davis, CA (Kv2.1, K89/34 and Kv2.2, N37B/1) and used at a 1/1000 dilution in  
437 NIS with 10% goat serum and 0.1% Triton X-100 for 1 hr at room temperature followed by three 5 min  
438 washes in NIS and then a 45 min secondary antibody (1/2000 dilution) incubation at room temperature in  
439 NIS with 10% goat serum and 0.1% Triton X-100. The Alexa Fluor 488-conjugated goat anti-mouse IgG  
440 (A11001) secondary antibody was from Invitrogen (Waltham, MA). Cells were then rinsed three times for 5  
441 min each, immediately mounted under glass coverslips with Aqua-Poly/Mount (Polysciences, Warrington,  
442 PA), and imaged as described below. Synapsin 1/2 rabbit polyclonal antibody (002 106) was obtained from  
443 Synaptic Systems (Goettingen, Germany) and used at 1/2000 as described above except that here the  
444 secondary antibody was Alexa Fluor 647-conjugated goat anti-rabbit IgG (A21244), also from Invitrogen.

445 Spinning disk confocal microscopy was performed on immunolabeled cultures using a Yokogawa  
446 (Musashino, JP) based CSUX1 system with an Olympus (Tokyo, JP) IX83 inverted stand, and coupled to  
447 an Andor (Abingdon, GB) laser launch containing 405, 488, 568, and 637 nm diode lasers, 100-150 mW  
448 each. Images were collected using an Andor iXon EMCCD camera (DU-897) and 100X Plan Apo, 1.4 NA  
449 objective. To prevent bleed over between fluorescent channels all imaging was performed sequentially with  
450 paired excitation-emission filter settings. This confocal system uses MetaMorph software (version  
451 7.8.13.0). Image analysis and presentation was performed using Volocity v6.1.1 software and all images  
452 were filtered and adjusted for brightness and contrast.

453

#### 454 **Western Blotting**

455 To verify the efficiency of Kv2.1 knockdown, hippocampal neurons were treated at DIV 3 with AAV1-  
456 mCherry-pU6-Kv2.1 shRNA designed by OriGene (target sequence: CAGAGTCCTCCATCTACAC-  
457 CACAGCAAGT) and produced by Vector Biolabs. Untreated neurons were used as a control. At DIV 19,  
458 control and Kv2.1 shRNA virus-treated neurons were extracted in radioimmunoprecipitation assay (RIPA)  
459 buffer (50mM Tris, pH 8.0, 150mM NaCl, 1% Nonidet P-40 (NP-40), 0.5% sodium deoxycholate, and 0.1%  
460 SDS supplemented with protease inhibitors) for 1 hour at 4°C. The lysates were centrifuged at 13000g at  
461 4°C for 10 min, and the protein concentrations were measured with bicinchoninic acid assays. The proteins  
462 were loaded and run on SDS-PAGE gels, transferred to PVDF membranes, and immunoblotted with anti-  
463 Kv2.1 antibody (K89/34, NeuroMab) and anti- $\alpha$  tubulin antibody (Sigma). The blots were detected using

464 chemiluminescence reagent on a Bio-Rad Chemidoc MP and Image J was used for quantification of de-  
465 tected bands.

466

### 467 ***Image and Data Analysis***

468 Images were analyzed in ImageJ using a custom-written plugin

469 (<http://rsb.info.nih.gov/ij/plugins/time-series.html>). To quantify fluorescence, we selected 1.4 $\mu$ m diameter

470 circular regions of interest (ROIs) from  $\Delta F$  images of each experiment, recentering on the brightest pixel

471 within the ROI in the  $\Delta F$  image. ROIs were selected based on localized responses of voltage, calcium, or

472 vesicle fusion, rather than morphology, to define a presynaptic terminal. All statistical data are presented

473 as means  $\pm$  SEM (n = number of neurons) and all experiments were performed on more than three inde-

474 pendent cultures. To measure the full-width at half maximum of QuasAr fluorescence, we used Origin ver-

475 sion 9.1 (Origin Lab). Quantification of vesicle fusion was obtained by normalizing the fluorescence change

476 in response to stimulation to the total number of vesicles measured by application of ammonium chloride.

477

### 478 ***Quantification and Statistical Analysis***

479 Statistical analyses were performed in Excel and Origin. We used paired two sample for means *t*-test for

480 paired results. Normally distributed data were processed with the Student's *t*-test for two independent dis-

481 tributions.

482

483

484

485

486

487

488

489

490

491

492

493

494

495

496

497

498

499 **References**

500

- 501 1. S. Pal, K. A. Hartnett, J. M. Nerbonne, E. S. Levitan, E. Aizenman, Mediation of  
502 neuronal apoptosis by Kv2.1-encoded potassium channels. *J Neurosci* **23**, 4798-4802  
503 (2003).
- 504 2. S. A. Malin, J. M. Nerbonne, Delayed rectifier K<sup>+</sup> currents, IK, are encoded by Kv2  
505 alpha-subunits and regulate tonic firing in mammalian sympathetic neurons. *J Neurosci*  
506 **22**, 10094-10105 (2002).
- 507 3. H. Murakoshi, J. S. Trimmer, Identification of the Kv2.1 K<sup>+</sup> channel as a major  
508 component of the delayed rectifier K<sup>+</sup> current in rat hippocampal neurons. *J Neurosci* **19**,  
509 1728-1735 (1999).
- 510 4. J. Du, L. L. Haak, E. Phillips-Tansey, J. T. Russell, C. J. McBain, Frequency-dependent  
511 regulation of rat hippocampal somato-dendritic excitability by the K<sup>+</sup> channel subunit  
512 Kv2.1. *J Physiol* **522 Pt 1**, 19-31 (2000).
- 513 5. K. M. O'Connell, R. Loftus, M. M. Tamkun, Localization-dependent activity of the  
514 Kv2.1 delayed-rectifier K<sup>+</sup> channel. *Proc Natl Acad Sci U S A* **107**, 12351-12356 (2010).
- 515 6. J. Fu *et al.*, Kv2.1 Clustering Contributes to Insulin Exocytosis and Rescues Human beta-  
516 Cell Dysfunction. *Diabetes* **66**, 1890-1900 (2017).
- 517 7. D. A. Jacobson *et al.*, Kv2.1 ablation alters glucose-induced islet electrical activity,  
518 enhancing insulin secretion. *Cell Metab* **6**, 229-235 (2007).
- 519 8. D. Greitzer-Antes *et al.*, Kv2.1 clusters on beta-cell plasma membrane act as reservoirs  
520 that replenish pools of newcomer insulin granule through their interaction with syntaxin-  
521 3. *J Biol Chem* **293**, 6893-6904 (2018).
- 522 9. E. Deutsch *et al.*, Kv2.1 cell surface clusters are insertion platforms for ion channel  
523 delivery to the plasma membrane. *Mol Biol Cell* **23**, 2917-2929 (2012).
- 524 10. N. C. Vierra, M. Kirmiz, D. van der List, L. F. Santana, J. S. Trimmer, Kv2.1 mediates  
525 spatial and functional coupling of L-type calcium channels and ryanodine receptors in  
526 mammalian neurons. *Elife* **8** (2019).
- 527 11. B. Johnson *et al.*, Kv2 potassium channels form endoplasmic reticulum/plasma  
528 membrane junctions via interaction with VAPA and VAPB. *Proc Natl Acad Sci U S A*  
529 **115**, E7331-E7340 (2018).
- 530 12. P. D. Fox *et al.*, Induction of stable ER-plasma-membrane junctions by Kv2.1 potassium  
531 channels. *J Cell Sci* **128**, 2096-2105 (2015).
- 532 13. M. West, N. Zurek, A. Hoenger, G. K. Voeltz, A 3D analysis of yeast ER structure  
533 reveals how ER domains are organized by membrane curvature. *J Cell Biol* **193**, 333-346  
534 (2011).
- 535 14. S. Carrasco, T. Meyer, STIM proteins and the endoplasmic reticulum-plasma membrane  
536 junctions. *Annu Rev Biochem* **80**, 973-1000 (2011).
- 537 15. Y. J. Chen, C. G. Quintanilla, J. Liou, Recent insights into mammalian ER-PM junctions.  
538 *Curr Opin Cell Biol* **57**, 99-105 (2019).
- 539 16. D. E. Clapham, Calcium signaling. *Cell* **131**, 1047-1058 (2007).
- 540 17. G. Montenegro *et al.*, Mutations in the ER-shaping protein reticulon 2 cause the axon-  
541 degenerative disorder hereditary spastic paraplegia type 12. *J Clin Invest* **122**, 538-544  
542 (2012).

- 543 18. M. P. Mattson, K. J. Tomaselli, R. E. Rydel, Calcium-destabilizing and  
544 neurodegenerative effects of aggregated beta-amyloid peptide are attenuated by basic  
545 FGF. *Brain Res* **621**, 35-49 (1993).
- 546 19. D. Chattopadhyay, S. Sengupta, First evidence of pathogenicity of V234I mutation of  
547 hVAPB found in Amyotrophic Lateral Sclerosis. *Biochem Biophys Res Commun* **448**,  
548 108-113 (2014).
- 549 20. J. de Juan-Sanz *et al.*, Axonal Endoplasmic Reticulum Ca(2+) Content Controls Release  
550 Probability in CNS Nerve Terminals. *Neuron* **93**, 867-881 e866 (2017).
- 551 21. M. Maletic-Savatic, N. J. Lenn, J. S. Trimmer, Differential spatiotemporal expression of  
552 K<sup>+</sup> channel polypeptides in rat hippocampal neurons developing in situ and in vitro. *J*  
553 *Neurosci* **15**, 3840-3851 (1995).
- 554 22. M. Martina, J. H. Schultz, H. Ehmke, H. Monyer, P. Jonas, Functional and molecular  
555 differences between voltage-gated K<sup>+</sup> channels of fast-spiking interneurons and  
556 pyramidal neurons of rat hippocampus. *J Neurosci* **18**, 8111-8125 (1998).
- 557 23. K. J. Rhodes, S. A. Keilbaugh, N. X. Barrezueta, K. L. Lopez, J. S. Trimmer, Association  
558 and colocalization of K<sup>+</sup> channel alpha- and beta-subunit polypeptides in rat brain. *J*  
559 *Neurosci* **15**, 5360-5371 (1995).
- 560 24. J. Du, J. H. Tao-Cheng, P. Zerfas, C. J. McBain, The K<sup>+</sup> channel, Kv2.1, is apposed to  
561 astrocytic processes and is associated with inhibitory postsynaptic membranes in  
562 hippocampal and cortical principal neurons and inhibitory interneurons. *Neuroscience* **84**,  
563 37-48 (1998).
- 564 25. J. S. Trimmer, Immunological identification and characterization of a delayed rectifier  
565 K<sup>+</sup> channel polypeptide in rat brain. *Proc Natl Acad Sci U S A* **88**, 10764-10768 (1991).
- 566 26. P. M. Hwang, M. Fotuhi, D. S. Bredt, A. M. Cunningham, S. H. Snyder, Contrasting  
567 immunohistochemical localizations in rat brain of two novel K<sup>+</sup> channels of the Shab  
568 subfamily. *J Neurosci* **13**, 1569-1576 (1993).
- 569 27. H. I. Bishop *et al.*, Distinct Cell- and Layer-Specific Expression Patterns and Independent  
570 Regulation of Kv2 Channel Subtypes in Cortical Pyramidal Neurons. *J Neurosci* **35**,  
571 14922-14942 (2015).
- 572 28. D. R. Hochbaum *et al.*, All-optical electrophysiology in mammalian neurons using  
573 engineered microbial rhodopsins. *Nat Methods* **11**, 825-833 (2014).
- 574 29. I. H. Cho, L. C. Panzera, M. Chin, M. B. Hoppa, Sodium Channel beta2 Subunits Prevent  
575 Action Potential Propagation Failures at Axonal Branch Points. *J Neurosci* **37**, 9519-  
576 9533 (2017).
- 577 30. D. E. Antonucci, S. T. Lim, S. Vassanelli, J. S. Trimmer, Dynamic localization and  
578 clustering of dendritic Kv2.1 voltage-dependent potassium channels in developing  
579 hippocampal neurons. *Neuroscience* **108**, 69-81 (2001).
- 580 31. P. D. Sarmiere, C. M. Weigle, M. M. Tamkun, The Kv2.1 K<sup>+</sup> channel targets to the axon  
581 initial segment of hippocampal and cortical neurons in culture and in situ. *BMC Neurosci*  
582 **9**, 112 (2008).
- 583 32. H. Misonou, D. P. Mohapatra, M. Menegola, J. S. Trimmer, Calcium- and metabolic  
584 state-dependent modulation of the voltage-dependent Kv2.1 channel regulates neuronal  
585 excitability in response to ischemia. *J Neurosci* **25**, 11184-11193 (2005).
- 586 33. B. C. Campbell *et al.*, mGreenLantern: a bright monomeric fluorescent protein with rapid  
587 expression and cell filling properties for neuronal imaging. *Proc Natl Acad Sci U S A*  
588 **117**, 30710-30721 (2020).



- 589 34. R. H. Scannevin, H. Murakoshi, K. J. Rhodes, J. S. Trimmer, Identification of a  
590 cytoplasmic domain important in the polarized expression and clustering of the Kv2.1 K+  
591 channel. *J Cell Biol* **135**, 1619-1632 (1996).
- 592 35. K. M. O'Connell, A. S. Rolig, J. D. Whitesell, M. M. Tamkun, Kv2.1 potassium channels  
593 are retained within dynamic cell surface microdomains that are defined by a perimeter  
594 fence. *J Neurosci* **26**, 9609-9618 (2006).
- 595 36. M. Kirmiz, N. C. Vierra, S. Palacio, J. S. Trimmer, Identification of VAPA and VAPB as  
596 Kv2 Channel-Interacting Proteins Defining Endoplasmic Reticulum-Plasma Membrane  
597 Junctions in Mammalian Brain Neurons. *J Neurosci* **38**, 7562-7584 (2018).
- 598 37. J. S. Trimmer, Expression of Kv2.1 delayed rectifier K+ channel isoforms in the  
599 developing rat brain. *FEBS Lett* **324**, 205-210 (1993).
- 600 38. J. Suzuki *et al.*, Imaging intraorganellar Ca<sup>2+</sup> at subcellular resolution using CEPIA. *Nat*  
601 *Commun* **5**, 4153 (2014).
- 602 39. S. T. Lim, D. E. Antonucci, R. H. Scannevin, J. S. Trimmer, A novel targeting signal for  
603 proximal clustering of the Kv2.1 K+ channel in hippocampal neurons. *Neuron* **25**, 385-  
604 397 (2000).
- 605 40. Y. Wu *et al.*, Contacts between the endoplasmic reticulum and other membranes in  
606 neurons. *Proc Natl Acad Sci U S A* **114**, E4859-E4867 (2017).
- 607 41. M. B. Hoppa, G. Gouzer, M. Armbruster, T. A. Ryan, Control and plasticity of the  
608 presynaptic action potential waveform at small CNS nerve terminals. *Neuron* **84**, 778-789  
609 (2014).
- 610 42. H. Xu *et al.*, Attenuation of the slow component of delayed rectification, action potential  
611 prolongation, and triggered activity in mice expressing a dominant-negative Kv2 alpha  
612 subunit. *Circ Res* **85**, 623-633 (1999).
- 613 43. S. M. Voglmaier *et al.*, Distinct endocytic pathways control the rate and extent of  
614 synaptic vesicle protein recycling. *Neuron* **51**, 71-84 (2006).
- 615 44. P. Ariel, M. B. Hoppa, T. A. Ryan, Intrinsic variability in Pv, RRP size, Ca(2+) channel  
616 repertoire, and presynaptic potentiation in individual synaptic boutons. *Front Synaptic*  
617 *Neurosci* **4**, 9 (2012).
- 618 45. G. Miesenbock, D. A. De Angelis, J. E. Rothman, Visualizing secretion and synaptic  
619 transmission with pH-sensitive green fluorescent proteins. *Nature* **394**, 192-195 (1998).
- 620 46. S. Sankaranarayanan, D. De Angelis, J. E. Rothman, T. A. Ryan, The use of pHluorins  
621 for optical measurements of presynaptic activity. *Biophys J* **79**, 2199-2208 (2000).
- 622 47. J. Herrington *et al.*, Blockers of the delayed-rectifier potassium current in pancreatic  
623 beta-cells enhance glucose-dependent insulin secretion. *Diabetes* **55**, 1034-1042 (2006).
- 624 48. H. Li *et al.*, Concurrent imaging of synaptic vesicle recycling and calcium dynamics.  
625 *Front Mol Neurosci* **4**, 34 (2011).
- 626 49. T. W. Chen *et al.*, Ultrasensitive fluorescent proteins for imaging neuronal activity.  
627 *Nature* **499**, 295-300 (2013).
- 628 50. S. B. Baver, K. M. O'Connell, The C-terminus of neuronal Kv2.1 channels is required for  
629 channel localization and targeting but not for NMDA-receptor-mediated regulation of  
630 channel function. *Neuroscience* **217**, 56-66 (2012).
- 631 51. N. J. Emptage, C. A. Reid, A. Fine, Calcium stores in hippocampal synaptic boutons  
632 mediate short-term plasticity, store-operated Ca<sup>2+</sup> entry, and spontaneous transmitter  
633 release. *Neuron* **29**, 197-208 (2001).

- 634 52. Y. Liang, L. L. Yuan, D. Johnston, R. Gray, Calcium signaling at single mossy fiber  
635 presynaptic terminals in the rat hippocampus. *J Neurophysiol* **87**, 1132-1137 (2002).
- 636 53. F. W. Lindhout *et al.*, VAP-SCRN1 interaction regulates dynamic endoplasmic reticulum  
637 remodeling and presynaptic function. *EMBO J* 10.15252/embj.2018101345, e101345  
638 (2019).
- 639 54. N. L. Chanaday *et al.*, Presynaptic store-operated Ca(2+) entry drives excitatory  
640 spontaneous neurotransmission and augments endoplasmic reticulum stress. *Neuron* **109**,  
641 1314-1332 e1315 (2021).
- 642 55. P. J. Dittmer, A. R. Wild, M. L. Dell'Acqua, W. A. Sather, STIM1 Ca(2+) Sensor Control  
643 of L-type Ca(2+)-Channel-Dependent Dendritic Spine Structural Plasticity and Nuclear  
644 Signaling. *Cell Rep* **19**, 321-334 (2017).
- 645 56. H. Misonou *et al.*, Bidirectional activity-dependent regulation of neuronal ion channel  
646 phosphorylation. *J Neurosci* **26**, 13505-13514 (2006).
- 647 57. H. Misonou, S. M. Thompson, X. Cai, Dynamic regulation of the Kv2.1 voltage-gated  
648 potassium channel during brain ischemia through neuroglial interaction. *J Neurosci* **28**,  
649 8529-8538 (2008).
- 650 58. H. Misonou *et al.*, Regulation of ion channel localization and phosphorylation by  
651 neuronal activity. *Nat Neurosci* **7**, 711-718 (2004).
- 652 59. T. Tanabe, K. G. Beam, J. A. Powell, S. Numa, Restoration of excitation-contraction  
653 coupling and slow calcium current in dysgenic muscle by dihydropyridine receptor  
654 complementary DNA. *Nature* **336**, 134-139 (1988).
- 655 60. T. Tanabe, K. G. Beam, B. A. Adams, T. Niidome, S. Numa, Regions of the skeletal  
656 muscle dihydropyridine receptor critical for excitation-contraction coupling. *Nature* **346**,  
657 567-569 (1990).
- 658 61. G. Ashrafi, J. de Juan-Sanz, R. J. Farrell, T. A. Ryan, Molecular Tuning of the Axonal  
659 Mitochondrial Ca(2+) Uniporter Ensures Metabolic Flexibility of Neurotransmission.  
660 *Neuron* **105**, 678-687 e675 (2020).
- 661 62. C. O. Wong *et al.*, A TRPV channel in *Drosophila* motor neurons regulates presynaptic  
662 resting Ca<sup>2+</sup> levels, synapse growth, and synaptic transmission. *Neuron* **84**, 764-777  
663 (2014).
- 664 63. W. P. Bartlett, G. A. Banker, An electron microscopic study of the development of axons  
665 and dendrites by hippocampal neurons in culture. I. Cells which develop without  
666 intercellular contacts. *J Neurosci* **4**, 1944-1953 (1984).
- 667 64. G. J. Brewer, J. R. Torricelli, E. K. Eevege, P. J. Price, Optimized survival of hippocampal  
668 neurons in B27-supplemented Neurobasal, a new serum-free medium combination. *J*  
669 *Neurosci Res* **35**, 567-576 (1993).
- 670
- 671
- 672

# Figure 1

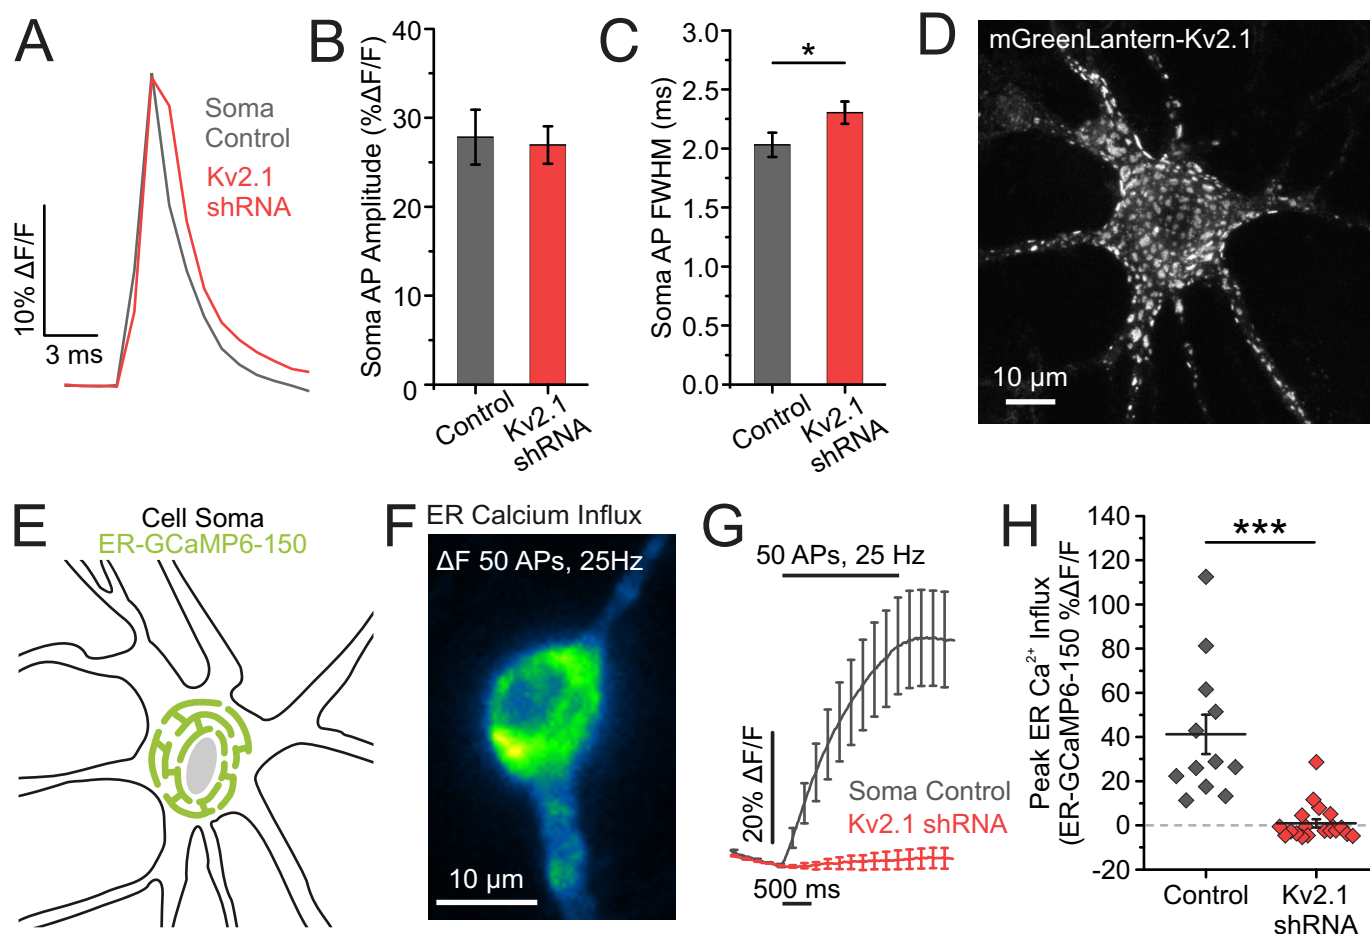

**Figure 1. Kv2.1 has both ionotropic and non-ionotropic functions in the soma.**

(A) Average traces of somatic QuasAr fluorescence, trial averaged from 100 AP stimulations. (B-C) Quantification of AP amplitude (B) and full width at half maximum (FWHM) (C) (Control neurons,  $n = 11$  cells; Kv2.1 KD neurons,  $n = 10$  cells;  $p < 0.05$  for FWHM comparison, Student's  $t$ -test). (D) Example image of a cultured hippocampal neuron expressing mGreenLantern-Kv2.1. Note distinct clusters form across the membrane surface. (E) Cartoon of a neuronal soma expressing the fluorescent calcium indicator ER-GCaMP6-150 in the ER lumen. (F) Image of the change in fluorescence of somatic ER-GCaMP6-150 in response to a train of stimulation. (G-H) Average fluorescence traces of somatic ER-GCaMP6-150 (G) and quantification of peak fluorescence (H) for both control and Kv2.1 knockdown neurons (Control neurons,  $n = 12$  cells; Kv2.1 KD neurons,  $n = 19$  cells;  $p < 0.001$ , Student's  $t$ -test).

## Figure 2

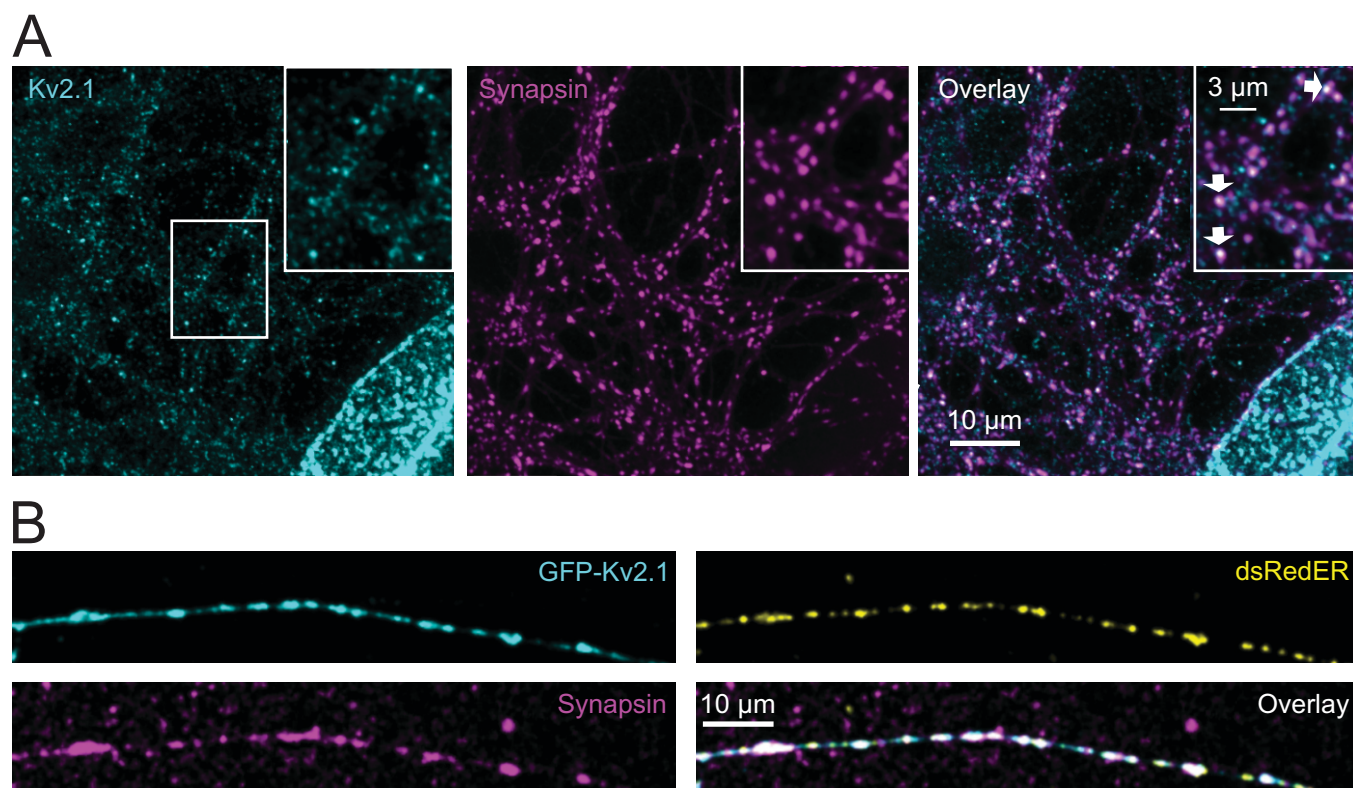

**Figure 2. Endogenous Kv2.1 localizes beyond the somatodendritic compartment into axons and terminals.**

**(A)** Immunolabeled images of endogenous Kv2.1 (*cyan*) and synapsin (*magenta*), with merged channels (*right*), in DIV 14 neurons. The center white box indicates the region enlarged as shown in the inset. Arrows indicate Kv2.1 colocalized with synapsin-positive presynaptic terminals. **(B)** Images of transfected and fixed DIV 16 neurons expressing GFP-Kv2.1 (*cyan*) and dsRedER (*yellow*), with immunolabeled synapsin (*magenta*).

## Figure 3

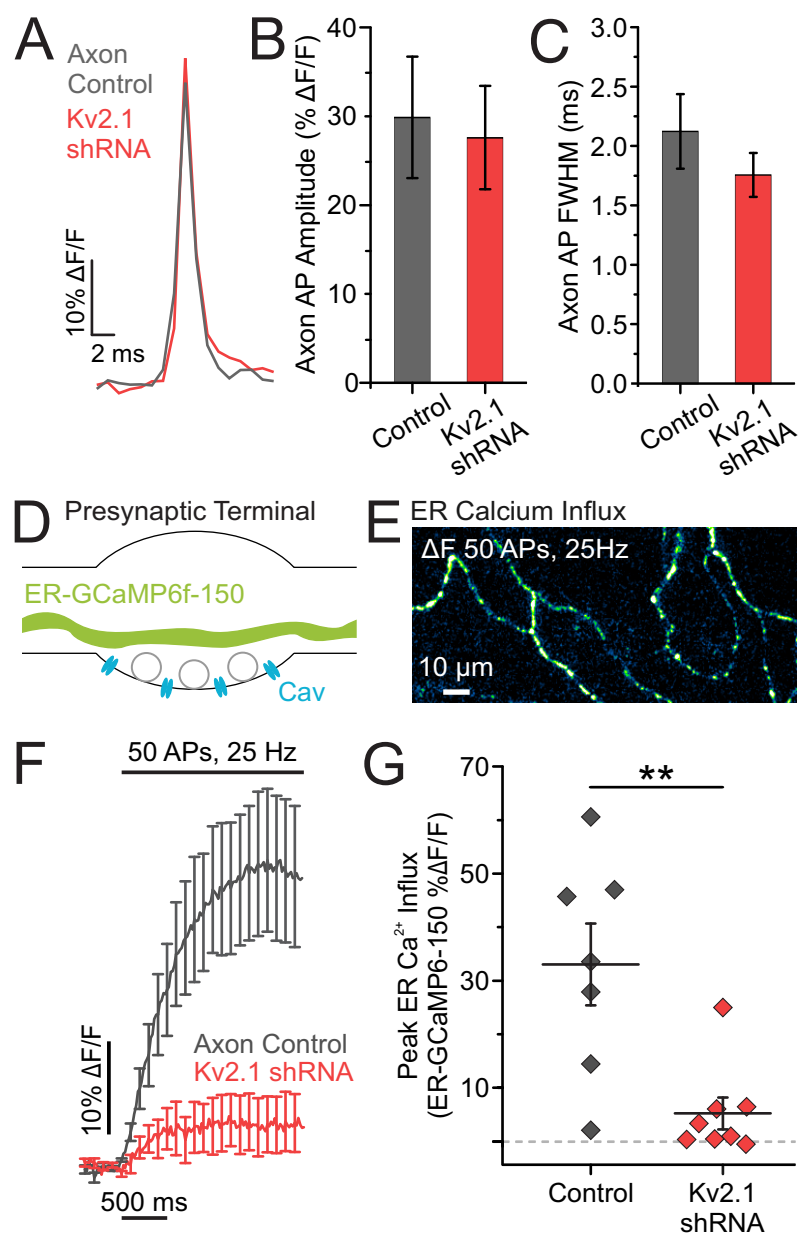

**Figure 3. Loss of Kv2.1 impairs axonal ER calcium influx during stimulation.**

(A) Representative traces of axonal QuasAr fluorescence, trial averaged from 100 AP stimulations. (B-C) Quantification of AP amplitude (B) and full width at half maximum (C) (Control neurons,  $n = 4$  cells; Kv2.1 KD neurons  $n = 6$  cells). (D) Cartoon of a presynaptic terminal expressing the fluorescent calcium indicator ER-GCaMP6-150 in the ER lumen. (E) Image of the change in fluorescence of axonal ER-GCaMP6-150 in response to a train of stimulation. (F-G) Average fluorescence traces of axonal ER-GCaMP6-150 (F) and quantification of peak fluorescence (G) for both control and Kv2.1 knockdown neurons (Control neurons,  $n = 7$  cells; Kv2.1 KD neurons,  $n = 8$  cells;  $p < 0.01$ , Student's  $t$ -test).

## Figure 4

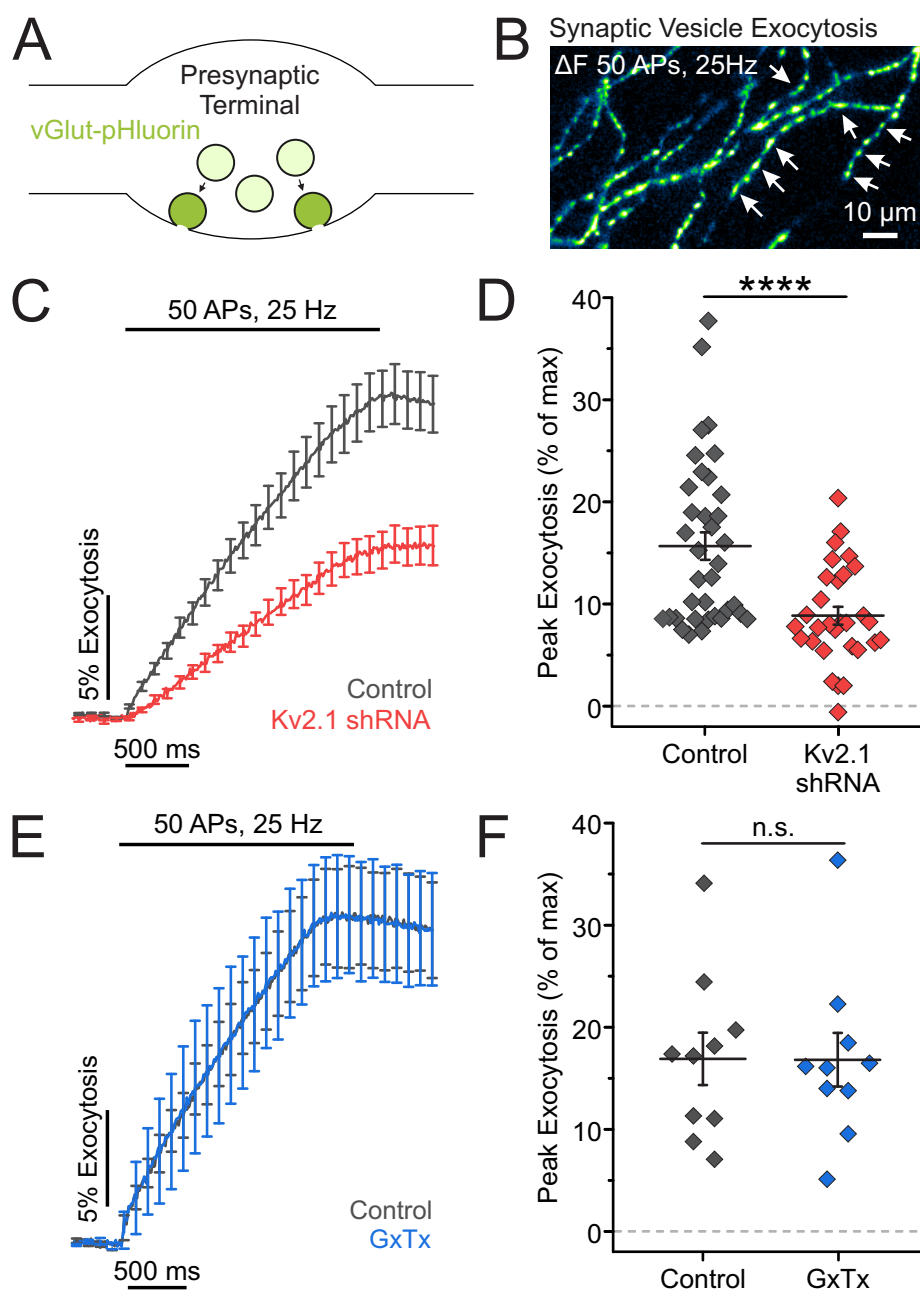

**Figure 4. Presynaptic Kv2.1 modulates neurotransmission independently of conduction.**

(A) Cartoon of a presynaptic terminal containing synaptic vesicles expressing vGlut-pHluorin, a pH-sensitive indicator of exocytosis. (B) Image of the change in fluorescence of vGlut-pHluorin in response to a train of stimulation. Arrows mark locations of presumptive presynaptic terminals. (C-D) Average fluorescence traces of vGlut-pHluorin (C) and quantification of peak fluorescence (D) for both control and Kv2.1 knockdown neurons (Control neurons,  $n = 36$  cells; Kv2.1 KD neurons,  $n = 30$  cells;  $p < 0.0001$ , Student's  $t$ -test). (E-F) Average fluorescence traces of vGlut-pHluorin (E) and quantification of peak fluorescence (F) for both control and Guangxitoxin-1E (GxTx) treated neurons ( $n = 10$  cells, paired  $t$ -test).

## Figure 5

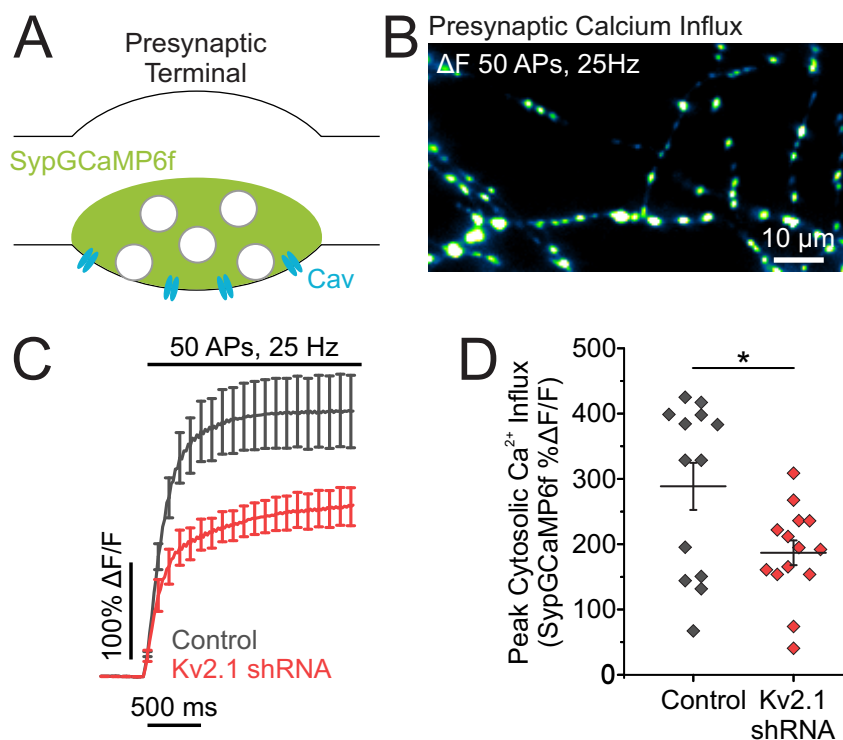

**Figure 5. Reducing Kv2.1 expression impairs evoked presynaptic calcium influx.**

(A) Cartoon of a presynaptic terminal expressing the fluorescent calcium indicator Synaptophysin-GCaMP6f (SypGCaMP6f). (B) Image of the change in fluorescence of SypGCaMP6f in response to a train of stimulation. (C-D) Average fluorescence traces of SypGCaMP6f (C) and quantification of peak fluorescence (D) in both control and Kv2.1 knockdown neurons (Control neurons,  $n = 13$  cells; Kv2.1 KD neurons,  $n = 14$  cells;  $p < 0.05$ , Student's  $t$ -test).

## Figure 6

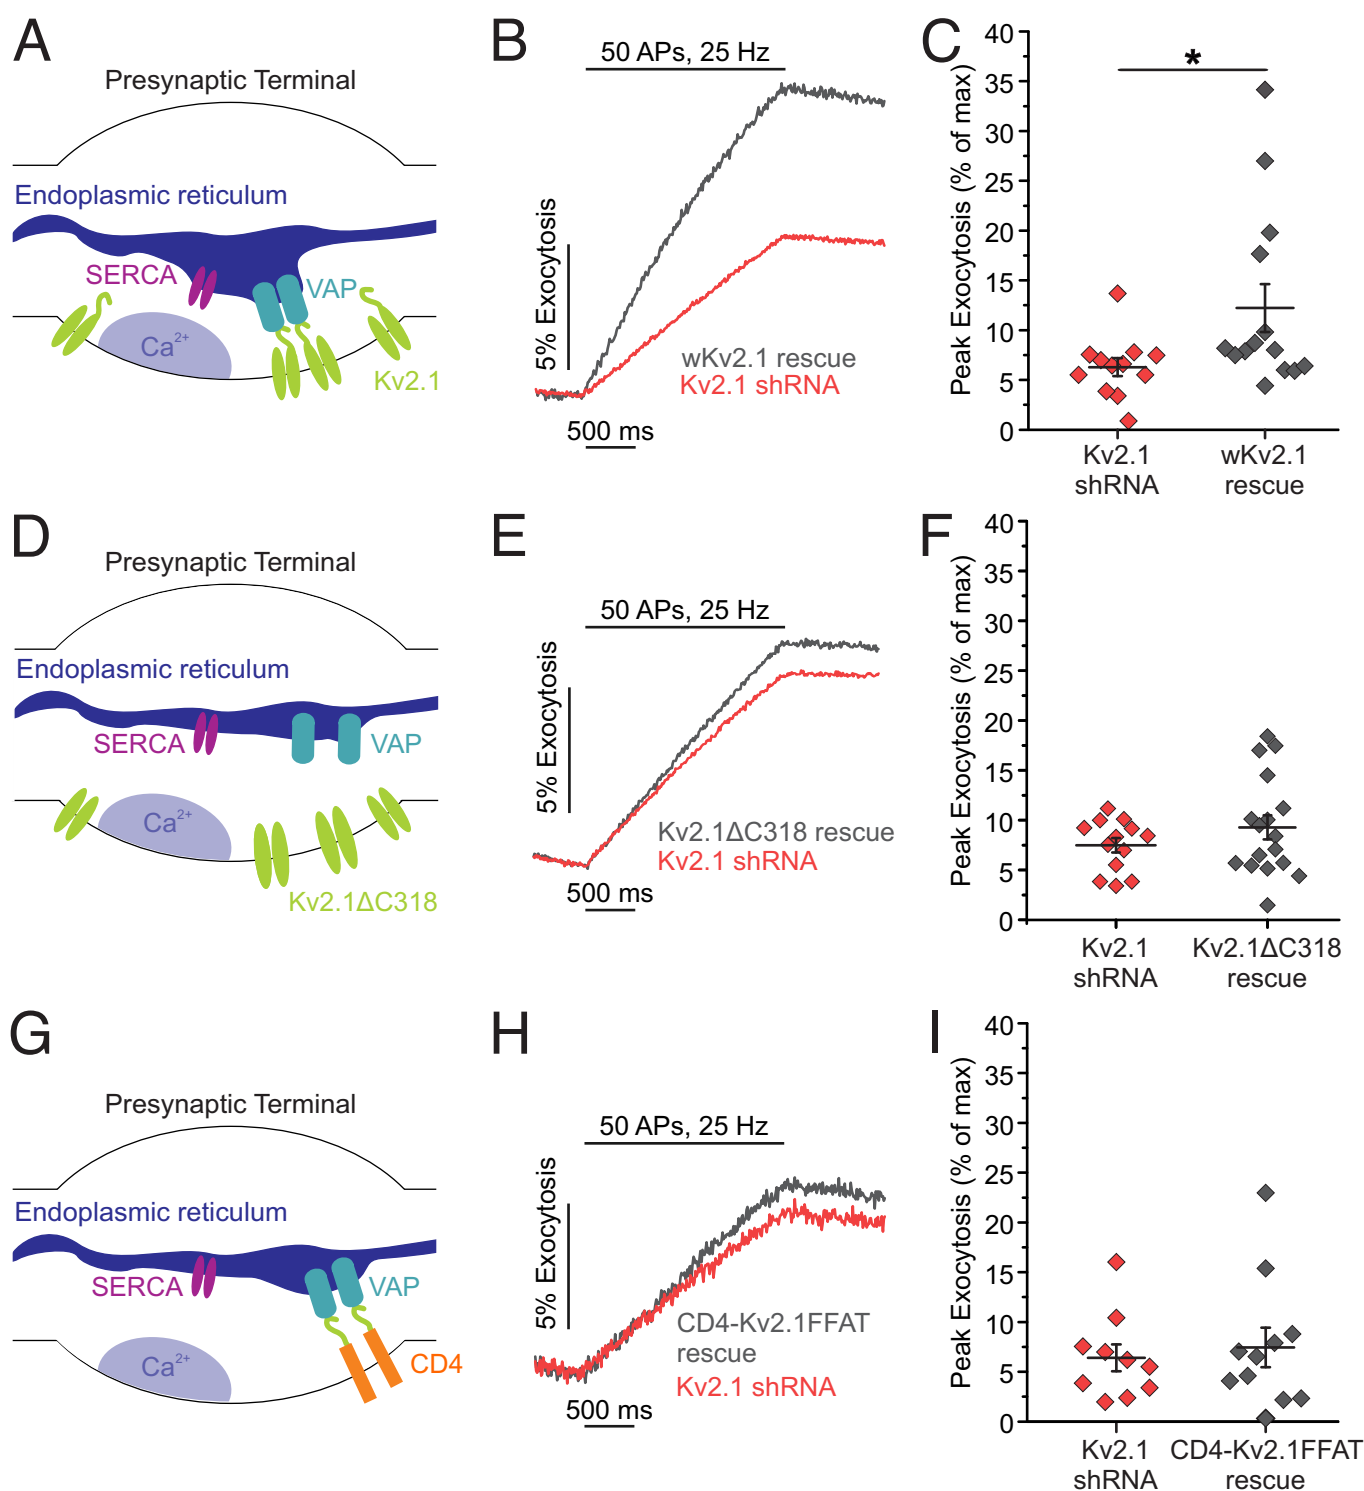

**Figure 6. The VAP-binding domain of Kv2.1 is necessary to rescue synaptic vesicle exocytosis.**

**(A)** Cartoon of a presynaptic terminal with endogenous Kv2.1 channels tethering the ER to the plasma membrane, positioning SERCA channels nearby to a source of presynaptic calcium influx. **(B-C)** Average fluorescence traces of vGlut-pHluorin **(B)** and quantification of peak fluorescence **(C)** in both Kv2.1 and shRNA-resistant (wobbled) Kv2.1 rescue neurons (Kv2.1 KD neurons,  $n = 12$  cells; wKv2.1 rescue neurons,  $n = 14$  cells;  $p < 0.05$ , Student's  $t$ -test). **(D)** Cartoon of a presynaptic terminal expressing mCherry-Kv2ΔC318, which is missing the Kv2.1 VAP-binding domain and does not localize SERCA near sites of presynaptic calcium influx. **(E-F)** Average fluorescence traces of vGlut-pHluorin **(E)** and quantification of peak fluorescence **(F)** in both Kv2.1 shRNA and Kv2ΔC318 rescue neurons (Kv2.1 KD neurons,  $n = 13$  cells; Kv2ΔC318 neurons,  $n = 17$  cells). **(G)** Cartoon of a presynaptic terminal expressing the CD4-Kv2.1FFAT chimera, which creates ER-plasma membrane junctions perhaps in alternate locations away from sites of presynaptic calcium influx. **(H-I)** Average fluorescence traces of vGlut-pHluorin **(H)** and quantification of peak fluorescence **(I)** in both Kv2.1 shRNA and CD4-Kv2.1FFAT rescue neurons (Kv2.1 KD neurons,  $n = 10$  cells; CD4-Kv2.1FFAT neurons,  $n = 11$  cells).



# Supplementary Figure 1

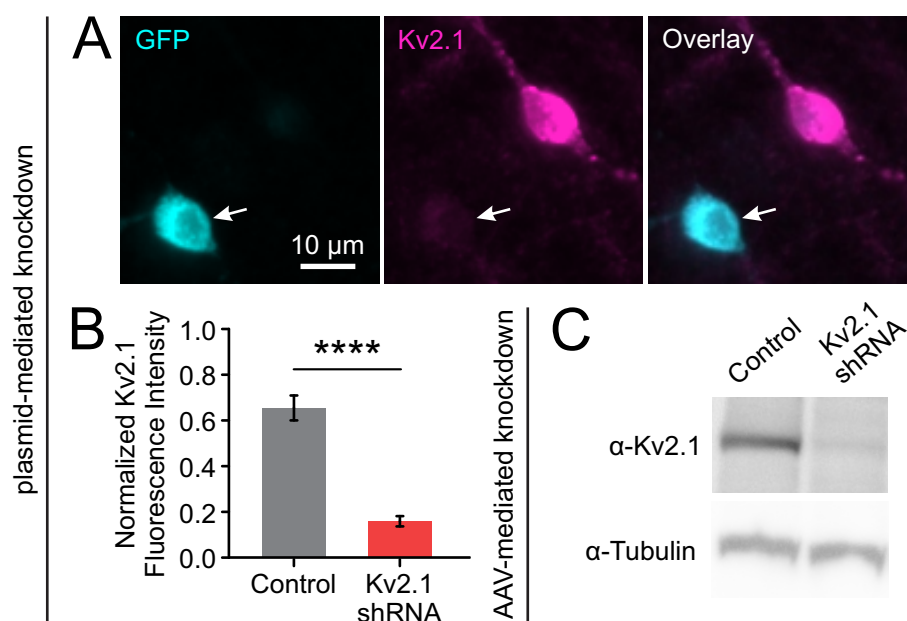

## Supplementary Figure 1. Kv2.1 expression is reduced with genetic knockdown.

Kv2.1 shRNA was designed to efficiently remove not only Kv2.1 conductance but the protein itself to examine both conducting and non-conducting roles. Plasmid encoding shRNA was delivered using  $\text{Ca}^{2+}$  phosphate-based transfection to a small fraction of neurons in culture (<1% of total neurons). This allows comparison of protein expression levels of each cell with adjacent untransfected neurons to examine the efficiency of protein knockdown. **(A-B)** Cultured hippocampal neurons were immunostained for GFP and endogenous Kv2.1. Arrows mark a neuron co-transfected with GFP and Kv2.1 shRNA that is depleted of endogenous Kv2.1. **(B)** Quantification of immunostained fluorescence intensity (Control neurons,  $n = 20$  cells; Kv2.1 KD neurons,  $n = 38$  neurons;  $p < 0.0001$ , Student's  $t$ -test). We also developed an adeno-associated virus (AAV) to deliver this same shRNA to quantify knockdown of total protein levels using a Western blot **(C)** for neurons with AAV-mediated Kv2.1 knockdown by shRNA with  $\alpha$ -tubulin as a loading control to mark total protein content.

## Supplementary Figure 2

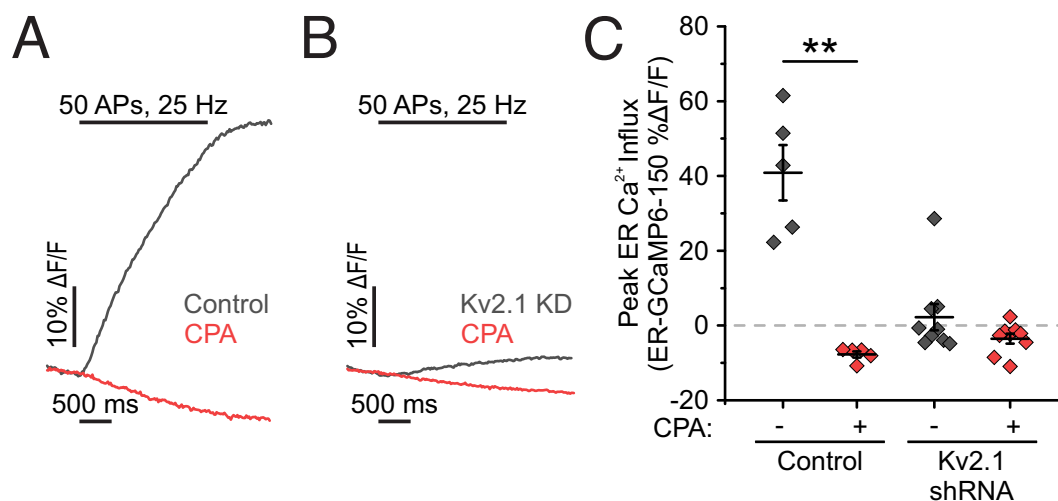

### Supplementary Figure 2. ER $\text{Ca}^{2+}$ uptake is mediated by SERCA pumps.

The only known major conduit for  $\text{Ca}^{2+}$  to enter the ER is through the SERCA pumps. As such, we used the specific inhibitor cyclopiazonic acid (CPA) to confirm that Kv2.1 was enabling uptake of cytosolic  $\text{Ca}^{2+}$  through SERCA pumps. **(A-B)** Average fluorescence traces of somatic ER-GCaMP6f-150 with CPA treatment in control **(A)** and Kv2.1 knockdown **(B)** neurons. **(C)** Quantification of peak fluorescence (Control neurons,  $n = 5$  cells; Kv2.1 KD neurons,  $n = 9$  cells;  $p < 0.01$ , paired  $t$ -test).

## Supplementary Figure 3

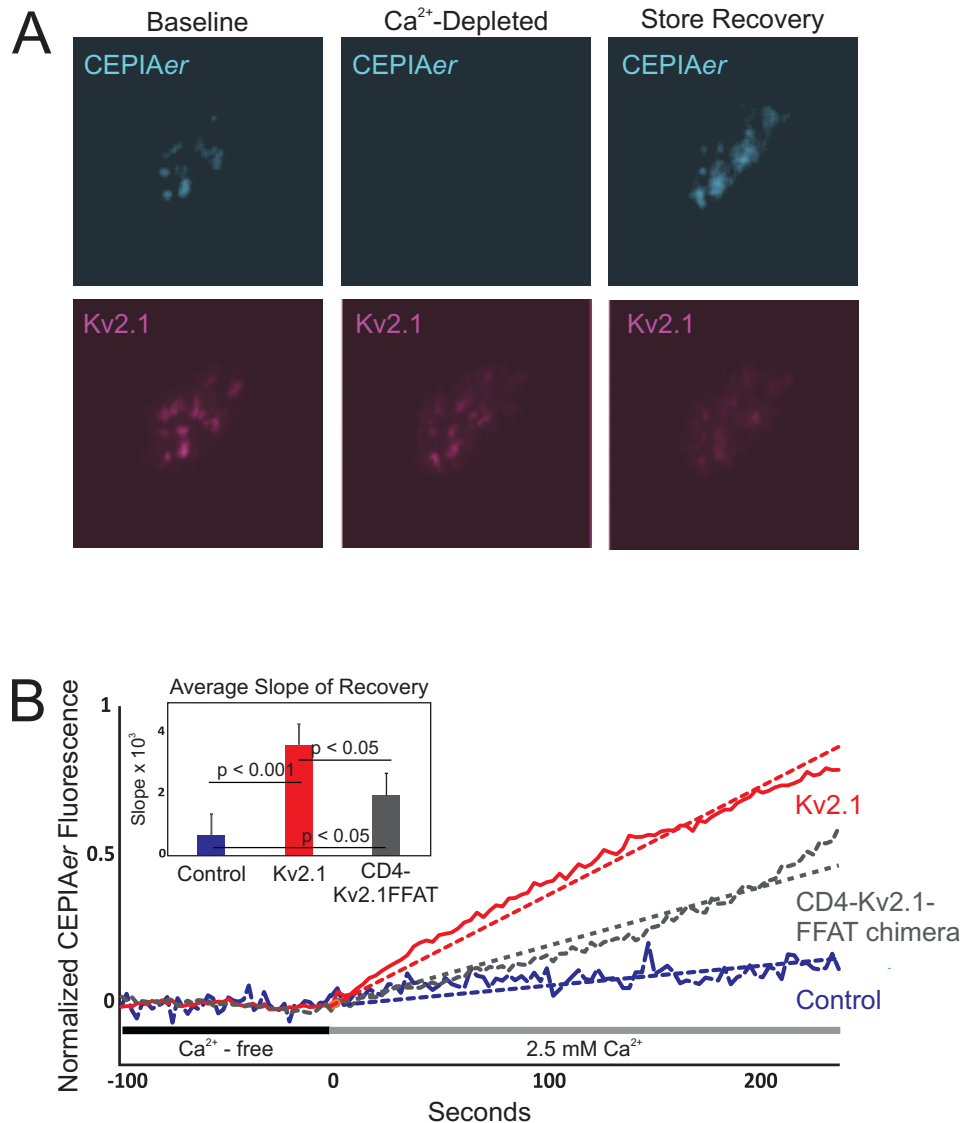

### Supplementary Figure 3. Somatic ER Ca<sup>2+</sup> refilling following depletion is enhanced in the presence of Kv2.1.

The inability of the ER to take up Ca<sup>2+</sup> during AP stimulation revealed a specific role for Kv2.1 to couple Ca<sup>2+</sup> handling with electrical stimulation. We also tested a potential role for Kv2.1 in facilitating Ca<sup>2+</sup> uptake into the ER after depletion of Ca<sup>2+</sup> from the ER by a prolonged removal of extracellular Ca<sup>2+</sup>. Young DIV 7 neurons have two advantages to deploy in this study: first, they have very low endogenous expression of Kv2.1; second, they are still growing on the glass coverslip prior to astrocyte expansion and interpolation beneath the neurons. As such they are amenable to high-resolution imaging of ER-PM junctions using total-internal reflection microscopy (TIRF). This method revealed that full-length Kv2.1 generates efficient ER-calcium refilling, while simply expressing the CD4-Kv2.1FFAT motif chimera, which forms ER/PM junctions and concentrates VAPs here without other Kv2.1 sequence (11), only partially enhances ER Ca<sup>2+</sup> refilling, perhaps due to simply increasing ER/PM contact area. **(A)** Examples of TIRF-based ER Ca<sup>2+</sup> imaging with CEPIAer at Kv2.1-induced ER/PM contact sites before, immediately after store depletion, and after store recovery. **(B)** Refilling rates at different ER/PM junctions, averaged from four independent measurements per condition.

## Supplementary Figure 4

A

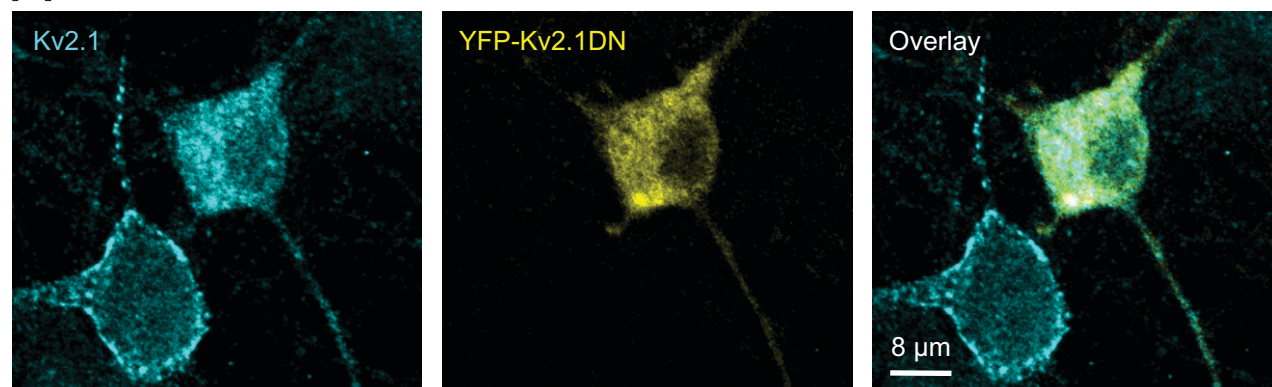

B

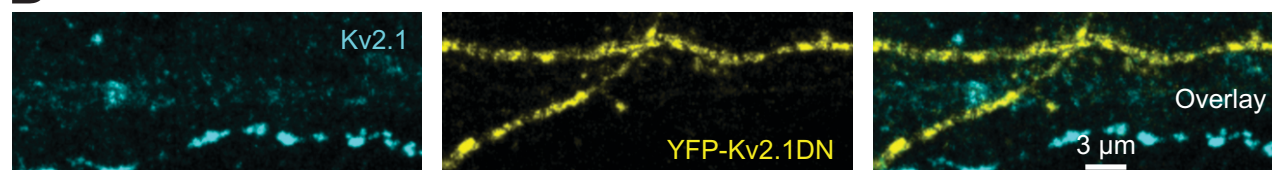

### Supplementary Figure 4. Dominant-negative verification of endogenous Kv2.1 immunolocalization to axons.

Expression of a YFP-tagged dominant-negative form of Kv2.1 (YFP-Kv2.1DN, composed of just the YFP-tagged Kv2.1 N-terminus and first transmembrane domain) prevents trafficking of Kv2.1 tetramers to the neuronal surface. We used this construct to validate the immunolabeling of endogenous Kv2.1 by comparing YFP-Kv2.1DN-transfected neurons with untransfected neighbors. **(A)** Examples of immunolabeled endogenous Kv2.1 (*cyan*) and YFP-Kv2.1DN (*yellow*) in the somas of two DIV 16 neurons. Note the membrane expression of Kv2.1 in the neuron on the left without YFP, while the neuron expressing YFP-Kv2.1DN shows Kv2.1 restricted to the interior of the cell body where the DN-endogenous Kv2.1 complex likely remains trapped in the ER. **(B)** Examples of immunolabeled endogenous Kv2.1 and YFP-Kv2.1DN in two adjacent axons.

# Supplementary Figure 5

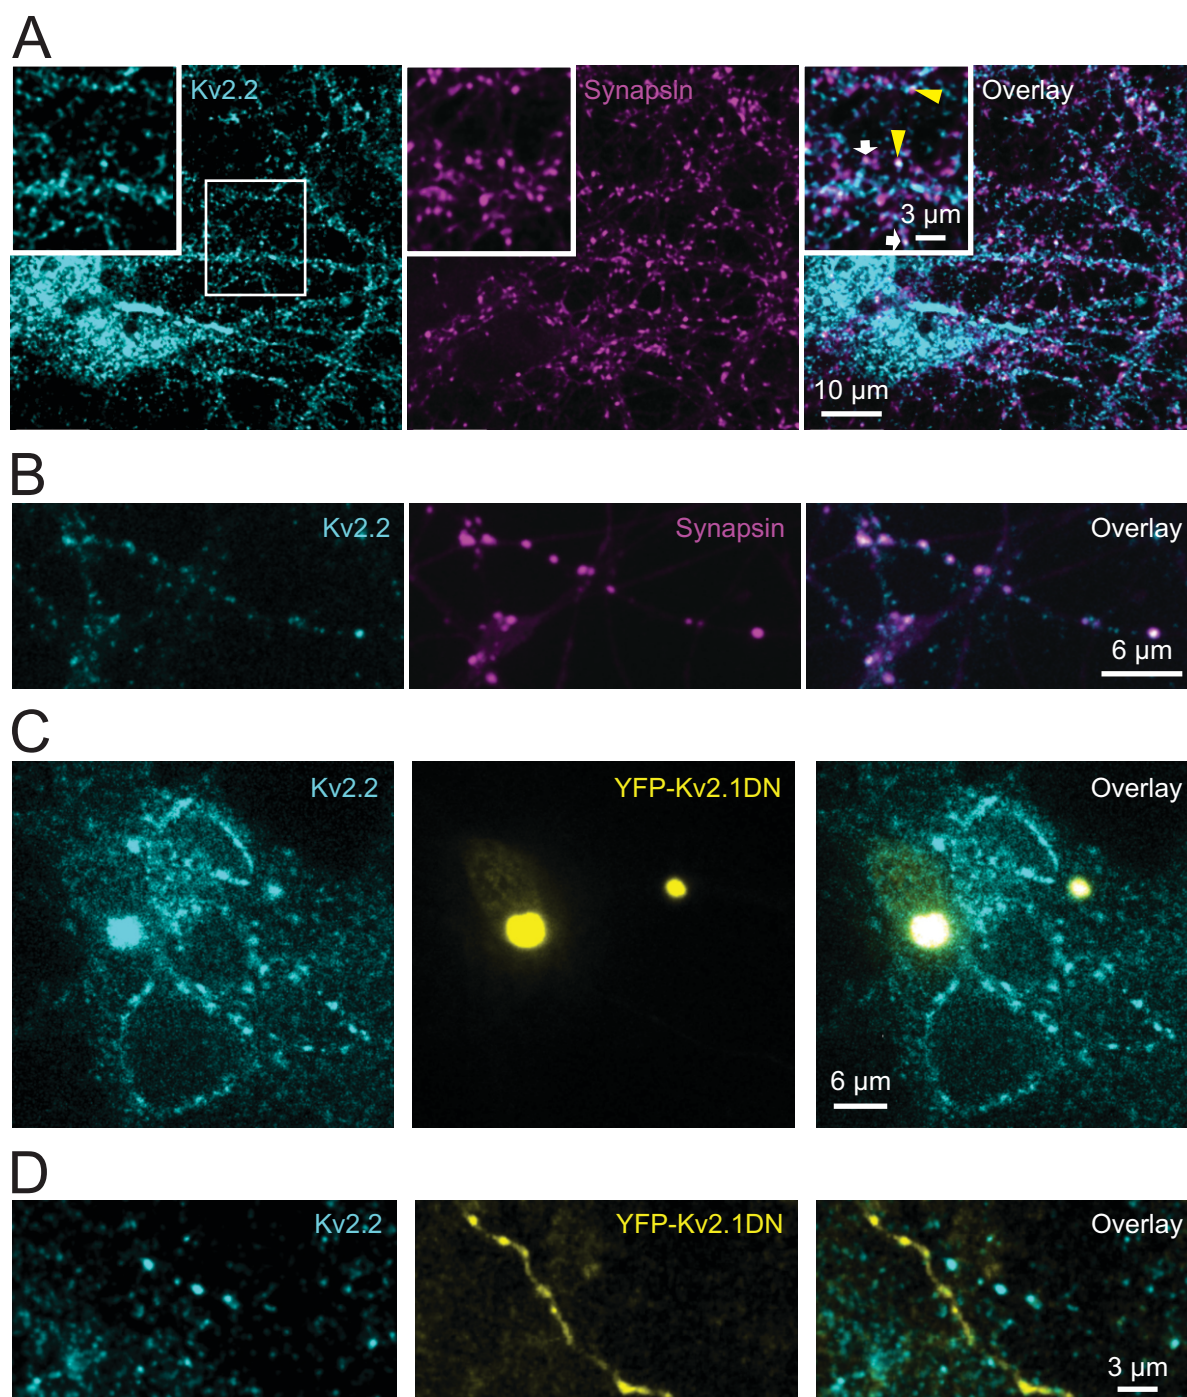

## Supplementary Figure 5. Immunolocalization of endogenous Kv2.2.

**(A)** Immunolabeling of endogenous Kv2.2 (cyan) and synapsin (magenta), with merged channels (right), in DIV 20 cultured hippocampal neurons. The center white box indicates the region enlarged as shown in the inset. The white arrows indicate Kv2.2 colocalized with synapsin-positive presynaptic terminals and the yellow arrowheads point to areas where the colocalization is less exact. **(B)** Colocalization of endogenous Kv2.2 with synapsin in an isolated axon. Expression of the dominant-negative form of Kv2.1 (YFP-Kv2.1DN), which also assembles with Kv2.2, was again used to validate the immunolabeling of endogenous Kv2.2 by comparing DN-transfected with untransfected neurons. **(C-D)** Examples of immunolabeled endogenous Kv2.2 (cyan) in neurons with and without the expressed YFP-Kv2.1DN (yellow) in somas and axons, respectively, of neurons at DIV 14. In **(C)**, note the cell surface expression of Kv2.2 in the YFP-Kv2.1DN-free neurons and the dramatic accumulation of Kv2.2 with the DN in the interior of the two YFP-positive cells.

## Supplementary Figure 6

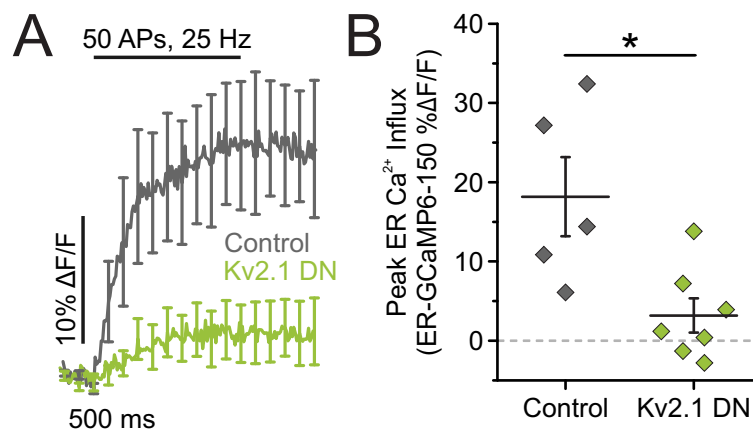

### Supplementary Figure 6. Genetic knockdown with a Kv2.1 dominant-negative subunit decreases ER $\text{Ca}^{2+}$ influx.

To determine what contribution Kv2.2 could potentially make to enable ER  $\text{Ca}^{2+}$  uptake in axons, we expressed the dominant negative form of Kv2.1 to remove both Kv2.1 and Kv2.2 from the membrane surface. This impaired ER  $\text{Ca}^{2+}$  uptake to the same extent as removing Kv2.1 alone, suggesting a minor or non-existent role for Kv2.2 in modulating stimulation-evoked ER  $\text{Ca}^{2+}$  uptake in hippocampal axons. **(A-B)** Average fluorescence traces of axonal ER-GCaMP6f-150 **(A)** and quantification of peak fluorescence **(B)** for both control and Kv2.1 DN neurons (Control neurons,  $n = 5$  cells; Kv2.1 DN neurons,  $n = 7$  cells;  $p < 0.05$ , Student's  $t$ -test).

# Supplementary Figure 7

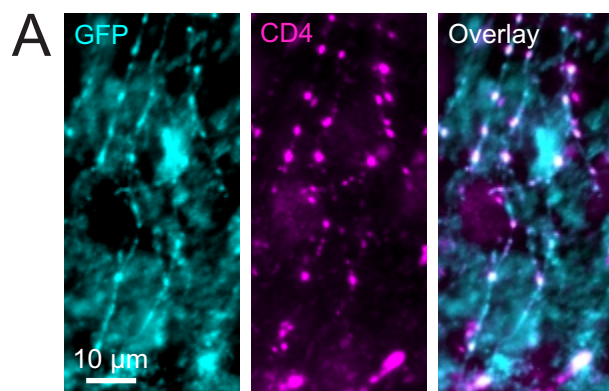

## Supplementary Figure 7. CD4-Kv2.1FFAT traffics to the distal axon.

Although CD4 protein trafficking is not typically subject to polarized trafficking, we wanted to make sure that CD4-Kv2.1FFAT expression patterns were still robust in the axons. Indeed, punctate fluorescence was visible in neurons simply expressing the chimera to confirm axonal trafficking.

**(A)** Neurons expressing Kv2.1 shRNA and CD4-Kv2.1FFAT were immunolabeled against CD4 and GFP as a transfection marker. Scale bar 10µm.
